1 **An antibody targeting the N-terminal domain of SARS-CoV-2 disrupts the spike trimer**

2

3 Naveenchandra Suryadevara<sup>1</sup>, Andrea R. Shiakolas<sup>1,2</sup>, Laura A. VanBlargan<sup>3</sup>, Elad Binshtein<sup>1</sup>,  
4 Rita E. Chen<sup>3,4</sup>, James Brett Case<sup>3</sup>, Kevin J. Kramer<sup>1,2</sup>, Erica Armstrong<sup>1</sup>, Luke Myers<sup>1</sup>, Andrew  
5 Trivette<sup>1</sup>, Christopher Gainza<sup>1</sup>, Rachel S. Nargi<sup>1</sup>, Christopher N. Selverian<sup>5</sup>, Edgar Davidson<sup>5</sup>,  
6 Benjamin J. Doranz<sup>5</sup>, Summer M. Diaz<sup>1</sup>, Laura S. Handal<sup>1</sup>, Robert H. Carnahan<sup>1,6</sup>, Michael S.  
7 Diamond<sup>3,4,7</sup>, Ivelin S. Georgiev<sup>1,2</sup>, James E. Crowe, Jr.<sup>1,2,6,\*</sup>

8 <sup>1</sup>Vanderbilt Vaccine Center, Vanderbilt University Medical Center, Nashville, TN, 37232,  
9 USA

10 <sup>2</sup>Department of Pathology, Microbiology and Immunology, Vanderbilt University Medical  
11 Center, Nashville, TN, 37232, USA

12 <sup>3</sup> Department of Medicine, Washington University School of Medicine, Saint Louis, MO,  
13 63110 USA

14 <sup>4</sup> Department of Pathology & Immunology, Washington University School of Medicine, Saint  
15 Louis, MO, 63110 USA

16 <sup>5</sup>Integral Molecular, Philadelphia, PA, 19104, USA

17 <sup>6</sup>Department of Pediatrics, Vanderbilt University Medical Center, Nashville, TN, 37232, USA

18 <sup>7</sup>Department of Molecular Microbiology, Washington University School of Medicine, Saint  
19 Louis, MO, 63110, USA

20

21 \*To whom correspondence should be addressed

22 **SUMMARY**

23

24 The protective human antibody response to the severe acute respiratory syndrome coronavirus 2  
25 (SARS-CoV-2) virus focuses on the spike (S) protein which decorates the virion surface and  
26 mediates cell binding and entry. Most SARS-CoV-2 protective antibodies target the receptor-  
27 binding domain or a single dominant epitope ('supersite') on the N terminal domain (NTD).  
28 Here, using the single B cell technology LIBRA-seq, we isolated a large panel of NTD-reactive  
29 and SARS-CoV-2 neutralizing antibodies from an individual who had recovered from COVID-  
30 19. We found that neutralizing antibodies to the NTD supersite commonly are encoded by the  
31 *IGHV1-24* gene, forming a genetic cluster that represents a public B cell clonotype. However, we  
32 also discovered a rare human antibody, COV2-3434, that recognizes a site of vulnerability on the  
33 SARS-CoV-2 S protein in the trimer interface and possesses a distinct class of functional  
34 activity. COV2-3434 disrupted the integrity of S protein trimers, inhibited cell-to-cell spread of  
35 virus in culture, and conferred protection in human ACE2 transgenic mice against SARS-CoV-2  
36 challenge. This study provides insight about antibody targeting of the S protein trimer interface  
37 region, suggesting this region may be a site of virus vulnerability.

38

39 **Keywords:** Coronavirus; SARS-CoV-2; Antibodies, Neutralizing; N-terminal domain.

## 40 INTRODUCTION

41

42 During the COVID-19 pandemic, more than 150 vaccine candidates have been developed, but  
43 only a few have been licensed. Most licensed vaccines encode the full-length spike (S) protein  
44 including two stabilizing proline mutations (S2P) of SARS-CoV-2 (Baden et al., 2021; Polack  
45 et al., 2020; Turner et al., 2021c) and have proven effective in protecting against SARS-CoV-  
46 2 disease. Although SARS-CoV-2 vaccines have been developed at unprecedented speed,  
47 several questions remain about efficacy and the durability of protective immunity associated  
48 with serum neutralizing antibodies generated against the S protein. Efficacy studies are  
49 complicated by the emergence of SARS-CoV-2 variants of concern (VOC) that can escape  
50 some neutralizing antibodies. Antibodies that neutralize SARS-COV-2 VOC have been  
51 studied broadly by many groups, both in terms of their potency and structure (Barnes et al.,  
52 2020; Baum et al., 2020; Cerutti et al., 2021b; Chen et al., 2021b; Chi et al., 2020; Dong et  
53 al., 2021; Hansen et al., 2020; McCallum et al., 2021; Pinto et al., 2020; Rogers et al., 2020;  
54 Shi et al., 2020; Suryadevara et al., 2021; Turner et al., 2021b; Zost et al., 2020a). Similarly, it  
55 has been reported that unrelated individuals can produce genetically and functionally similar  
56 clones of antibodies (“public clonotypes”) following infection or vaccination ((Chen et al.,  
57 2021a; Robbiani et al., 2020; Soto et al., 2019; Yuan et al., 2020)18-22).

58

59 The receptor binding domain (RBD) of the S protein interacts with angiotensin-converting  
60 enzyme 2 (ACE2). In addition, the N-terminal domain (NTD) of S has been proposed to  
61 cooperate with receptors or co-receptors, such as dendritic cell-specific intercellular adhesion

62 molecule-3-grabbing non-integrin (DC-SIGN or CD209), neuropilin-1 (NRP-1), and liver-  
63 /lymph-node-specific intracellular adhesion molecules-3 grabbing non-integrin (L-SIGN or  
64 CD209L) to mediate viral attachment and enable SARS-CoV-2 infection via the established  
65 ACE2 receptor pathway (Amraei et al., 2021; Cantuti-Castelvetri et al., 2020; Daly et al.,  
66 2020; Lempp et al., 2021). Furthermore, the NTD of SARS-CoV-2 spike reportedly binds  
67 biliverdin by recruitment of tetrapyrrole rings, to evade neutralization of SARS-CoV-2 by  
68 some antibodies (Rosa et al., 2021). SARS-CoV-2 S appears to exhibit conformational  
69 flexibility of divergent loop regions in the NTD to accommodate diverse glycan-rich host  
70 sialosides that may allow it to infect host cells with wide tissue tropism (Awasthi et al., 2020).  
71 Taken together, our understanding of the functional qualities of the human antibody response  
72 against NTD is incomplete. We and other groups previously have identified potently  
73 neutralizing NTD-specific mAbs targeting one major antigenic site (Cerutti et al., 2021b; Chi  
74 et al., 2020; McCallum et al., 2021; Suryadevara et al., 2021; Voss et al., 2021; Wu et al.,  
75 2020). Here, using the single-B-cell barcoding LIBRA-seq antibody discovery technology, we  
76 performed targeted discovery of NTD-reactive antibodies from an individual who had  
77 recovered from a previous SARS-CoV-2 infection. Our results indicate that a dominant  
78 human B cell response to that major NTD antigenic site comprises clones encoded by  
79 common variable gene segments (*i.e.*, constitute a “public clonotype”). The scale of antibody  
80 discovery possible with LIBRA-seq also allowed us to identify a rare clone with unusual  
81 specificity and function.

82

## 83 **RESULTS**

84



85 **SARS-CoV-2 infection induces a strong response against NTD and durable neutralization**

86 **titers.** Peripheral blood samples were obtained following written informed consent from four

87 subjects (D1988, D1989, D1995 and D1951) infected in the United States who tested PCR-

88 positive for SARS-CoV-2 infection and one healthy donor (D269) who served as a negative

89 control (**Table S1**). We isolated plasma or serum specimens from the five individuals and

90 performed serum/plasma antibody ELISA binding assays using soluble proline-stabilized S

91 ectodomain (S2P<sub>ecto</sub>), RBD, or NTD protein from SARS-CoV-2 or S2P<sub>ecto</sub> protein from SARS-

92 CoV. All subjects (except the negative control) had circulating antibodies that recognized each of

93 the proteins tested, with the greatest reactivity against the SARS-CoV-2 S2P<sub>ecto</sub>, RBD and NTD

94 proteins (**Fig. 1A**). The serum antibody reactivity of one individual (D1989) was highest against

95 the SARS-CoV-2 NTD protein (**Fig. 1A**). Consequently, we focused our efforts on identifying B

96 cells from the blood samples of this individual, using sequential collections on day 18, 28, 58

97 and day 90 after onset of symptoms. This individual also possessed high serum neutralizing

98 antibody titers, as determined in an assay using a chimeric vesicular stomatitis virus (VSV)

99 displaying SARS-CoV-2 S protein (VSV-S) in a real time cell analysis (RTCA) method (10)

100 (**Fig. 1B**). The plasma neutralizing titer was high (NT<sub>50</sub>= 1:258) even three months after recovery

101 from SARS-CoV-2 infection. To corroborate the VSV-S-based neutralization results, we also

102 performed a serum-antibody focus reduction neutralization test (FRNT) using an authentic

103 SARS-CoV-2 strain (WA/1/2020). The authentic virus assay gave similar results to the VSV-

104 based assay (**Fig. 1C**).

105

106 **LIBRA-seq identifies antigen-specific B cells with high NTD specificity.** Next, we used the

107 LIBRA-seq (*Linking B Cell receptor to antigen specificity through sequencing*) method (Setliff

108 et al., 2019) to identify NTD-reactive B cells. This high-throughput technology enables  
109 determination of B cell receptor sequence and antigen reactivity at single-cell level. The LIBRA-  
110 seq antigen screening library included SARS-CoV-2 S protein stabilized in a prefusion  
111 conformation (S6P<sub>ecto</sub>) and NTD from SARS-CoV-2 (2019-nCoV), along with antigens from  
112 other coronavirus strains and negative control antigens. We identified 347 NTD-specific B cells  
113 from individual D1989 (day112). We recovered 108 B cells which expressed unique V<sub>H</sub>-JH-  
114 CDRH3-V<sub>L</sub>-J<sub>L</sub>-CDRL3 clonotypes and gave LIBRA-seq scores above a threshold of 1 for  
115 rNTD (**Fig. 2A**), and we were able to express 102 of these sequences as human mAbs. To  
116 confirm the antigen specificity predicted by the LIBRA-seq score, we tested all expressed mAbs  
117 for binding in ELISA to recombinant monomeric RBD or NTD of SARS-CoV-2 or trimeric  
118 S6P<sub>ecto</sub> of SARS-CoV-2 or trimeric S2P<sub>ecto</sub> of SARS-CoV proteins. We confirmed the predicted  
119 antigen specificity for greater than 90% of the clones (**Fig. 2B**). Most antibodies recognized  
120 NTD protein, except for COV2-3454 which recognized RBD (**Fig. 2B**).

121  
122 Additionally, using the RTCA method, we performed high-throughput neutralization assays with  
123 VSV-S and identified 9 mAbs that showed either full (100%) or partial (50 to 80%) neutralizing  
124 capacity (**Fig. 2B**). Next, we analyzed the sequences of the variable region genes for the 102  
125 expressed antibodies to assess the genetic diversity of antigen-specific B cell clonotypes  
126 discovered. The expressed antibodies had diverse sequence features, including varied V- and J-  
127 gene usage, CDR3 lengths, and somatic hypermutation levels for both the heavy and light chains  
128 (**Fig. S1a**). After clustering these clones based on the inferred immunoglobulin heavy variable  
129 (IGHV) gene, we noted that the *IGHV1-24* and *IGHV1-69* variable gene segments were used

130 frequently in this individual's response (**Fig. S1b**). Five of the nine neutralizing mAbs are  
131 encoded by the *IGHV1-24* gene segment and are clonally unrelated (**Fig. 2C**).

132

### 133 **Potently neutralizing antibodies against NTD belong to public clonotypes.**

134 Next, we determined the binding activity of the panel of NTD-reactive neutralizing antibodies.

135 Using serial dilution studies, we determined the half-maximum effective concentration ( $EC_{50}$ ) for

136 binding to the S6P<sub>ecto</sub> trimer protein, in comparison with a known NTD-reactive mAb (4A8) or a

137 negative control dengue-specific antibody (rDENV-2D22). NTD-reactive neutralizing antibodies

138 exhibited varied binding profiles with a diverse range of  $EC_{50}$  values (**Fig. 3A**). We also tested

139 the panel of antibodies for binding to cell-surface-displayed S protein on SARS-CoV-2-infected

140 cells according to the gating strategy shown in **Fig S2**. Unexpectedly, the NTD-targeting mAbs

141 stained infected cells with greater intensity (higher median fluorescence intensity [MFI]) than a

142 previously described high-affinity RBD-reactive potently neutralizing mAb (COV2-2196) (Zost

143 et al., 2020a) (**Fig. 3B**). We also determined the inhibitory potency for representative mAbs in

144 the quantitative VSV-S-based neutralization assay (**Fig. 3C**). These results confirmed that the

145 LIBRA-seq technology efficiently identifies mAbs with the correct antigen specificity and that

146 some of the NTD-reactive mAbs potently neutralize VSV-S infection based on RTCA

147 neutralization ((Suryadevara et al., 2021; Zost et al., 2020a). Next, we chose chose COV2-3434

148 for further study with FRNT as it showed a distinct phenotype both in binding and rVSV

149 neutralization. We performed FRNTs for mAb COV2-3434 using strains SARS-CoV-2 D614G

150 and chimeric strains expressing the B.1.351 (Beta) spike in the WA1/2020 background (Wash-B

151 1.351) (Chen et al., 2021b). COV2-3434 neutralized both strains of SARS-CoV-2 in a dose-

152 dependent manner, with half-maximal inhibitory ( $IC_{50}$ ) values of 5.5 or 32  $\mu\text{g/mL}$ , respectively

153 **(Fig. 3D)**. A comprehensive analysis of antibody variable gene sequences for SARS-CoV-2  
154 human mAbs revealed that the *IGHV1-24* gene segment is frequently used by vaccinated or  
155 convalescent individuals when targeting the NTD (**Table S2, Fig. S3**). Nevertheless, the clones  
156 recovered here were unique with diverse gene usage for both heavy and light chains. There was  
157 no bias for a particular HCDR3 length that confers NTD-specificity. Additionally, the *IGHV1-69*  
158 and *IGHV3-53* gene segments are over-represented in both RBD- and NTD-specific antibodies  
159 isolated from convalescent subjects. Of note, the *IGHV1-69* gene-encoded antibodies that reacted  
160 with NTD did *not* neutralize VSV-S, and the other  $V_H$  genes used (*IGHV1-2*, *IGHV3-23* and  
161 *IGHV3-53*) encoded clones with only moderate neutralizing capacity. Thus, the most potently  
162 neutralizing NTD-reactive antibodies isolated here were encoded by *IGHV1-24*.

163  
164 To determine if the function of *IGHV1-24*-encoded antibodies identified in this study was due to  
165 germline-encoded reactivity or the result of somatic mutations, we engineered ‘germline  
166 reversion’ (GR) recombinant antibodies that were reverted at residues that differed from the  
167 germline gene segments either in the heavy chain (GR-HC) or in both heavy and light chains  
168 (GR). After alignment of the sequences of *IGHV1-24*-encoded clones the with germline gene  
169 segment *IGHV1-24*, we chose the mAb COV2-3443 for further study, as it was the antibody with  
170 the fewest somatic mutations. We tested if the GR mAb shared similar functional properties with  
171 its somatically-mutated counterparts for binding to S protein or VSV-S neutralization. The  
172 COV2-3443 GR-HC mAb retained some binding and neutralization capacity, whereas COV2-  
173 3443 GR completely lost binding and neutralization capacity, suggesting that the functional  
174 activities required some or all of the somatic mutations present in the matured antibody (**Fig. 3**  
175 **E, F**).

176

177 **COV2-3434 maps to a distinct site from the NTD supersite.** We next defined antigenic sites  
178 on the NTD by competition-binding analysis. We used SARS-CoV-2 6P<sub>ecto</sub> protein to screen for  
179 NTD-reactive neutralizing mAbs that competed for binding with each other or with the  
180 previously described NTD-reactive mAbs COV2-2676 and COV2-2489 that recognize known  
181 epitope on NTD (10). We also used the previously described RBD-reactive neutralizing (COV2-  
182 2196 and COV2-2130) or non-neutralizing (rCR3022) mAbs as controls. We identified two  
183 groups of competing mAbs in the NTD (**Fig. 4A**). The first group competed for binding to the  
184 known NTD supersite, which we and others have described previously (Cerutti et al., 2021b; Chi  
185 et al., 2020; McCallum et al., 2021; Suryadevara et al., 2021). The second competition group  
186 contains a single mAb (COV2-3434) that bound to a site distinct from the epitope of all other  
187 NTD-reactive mAbs (**Fig. 4A**). We also tested competition of COV2-3434 mAb with the  
188 recently reported antibody 5-7, which binds a hydrophobic site on NTD. Our mAb COV2-3434  
189 did not compete for binding with mAb 5-7 either on SARS-CoV2-6P<sub>ecto</sub> or on NTD, revealing  
190 the COV2-3434 site is unique (**Fig. S4**).

191

192 **COV2-3434 exhibits trimer-disrupting properties.** To further probe the binding sites for these  
193 mAbs, we used negative-stain electron microscopy (nsEM) to image a stabilized trimeric form of  
194 the ectodomain of S protein (S6P<sub>ecto</sub> trimer) in complex with Fab fragment forms of COV2-3439  
195 or COV2-3434. We chose COV2-3439 as a representative mAb from the first competition group,  
196 as it was the most potently neutralizing antibody against VSV-S. COV2-3439 bound to the NTD  
197 and recognized the ‘closed’ conformational state of the S6P<sub>ecto</sub> trimer. We confirmed that the  
198 COV2-3439 antibody binds to the previously noted antigenic “supersite” on the NTD of the

199 S6P<sub>ecto</sub> trimer by overlaying the nsEM maps of the COV2-3439 Fab/S protein complex with our  
200 previously published COV2-2676 Fab/S complex (**Fig. 4B**).

201

202 Unexpectedly, we did not observe intact S protein trimers following a one-hour incubation with  
203 saturating concentrations of COV2-3434 Fab fragments. Shorter incubation times with Fabs (1, 5  
204 or 30 mins) showed more intact trimers in the grids (**Fig. 4C**). Representative 2D images  
205 revealed that Fabs were bound to the S protomers, suggesting that Fabs recognize an epitope that  
206 is not present or accessible on an intact S trimer (**Fig. 4D**). Although the 2D images are  
207 revealing, we could not create reconstructions of the Fab-protomers, since there were very  
208 limited views of the complexes. The data are consistent with a trimer-disruption mechanism in  
209 which binding of the COV2-3434 Fab to a partially occluded epitope drives the disruption of S  
210 protein trimer.

211

212 We next defined the COV2-3434 and COV2-3439 epitopes at the amino acid level using 2  
213 complementary methods: alanine-scanning loss-of-binding experiments and cell-surface S  
214 protein display method. Screening of the NTD alanine-scan library identified primary residues  
215 F43, F175, L176 and L226 as critical for binding of COV2-3434 (**Fig. 5A**), whereas for COV2-  
216 3439 residues R102, Y145, K147, W152, R246, Y248, P251 and G252 were identified (**Fig. S5**).  
217 None of these single-residue alanine mutants affected binding of the control NTD-reactive mAb  
218 COV2-2305 (**Fig. 5B**). As an alternative approach to learn more about the epitope recognized  
219 this trimer-disrupting antibody, we generated complexes of NTD subdomain with Fabs of  
220 COV2-3434 and COV2-3439. Interestingly, in NS-EM we noticed that the COV2-3434 Fab binds  
221 NTD at a 90° angle to that of the supersite-binding COV2-3439 Fab (**Fig. 5C**). Moreover, when

222 we overlaid this double Fab + rNTD complex onto that of the trimeric spike complex (7C2L  
223 model), COV2-3434 Fab tangentially clashed with interface of RBD and NTD (**Fig. 5C**).  
224 Modeling of double Fab and NTD complexes onto the spike monomer, dimer and trimer when  
225 RBD is open enabled us to locate Fab binding more precisely and suggested that the epitope  
226 recognized by COV2-3434 is occluded (**Fig. S6**). Recently, it was reported that the NTD of  
227 SARS-CoV-2 spike binds biliverdin and polysorbate 80 by recruitment of tetrapyrrole rings to  
228 evade antibody neutralization. However, our neutralization assays in the presence of biliverdin  
229 or polysorbate 80 did not affect COV2-3434 neutralization of VSV-S (**Fig. S7**), again suggesting  
230 this epitope is distinct. Additional structural studies are needed to determine structural basis for  
231 the trimer-disrupting phenotype of mAbs binding to this epitope.

232

233 The S protein exhibits high flexibility between domains and can exist in different conformations,  
234 allowing the immune system to target distinct epitopes and structural states (Henderson et al.,  
235 2020). Henderson *et al.* showed that conformations of the S protein can be controlled via rational  
236 design using expressed soluble ectodomains of the S proteins, in which the three RBDs are either  
237 locked in the all-RBDs ‘down’ position (S6P<sub>ecto</sub>-2C) or adopt ‘up’ state (S6P<sub>ecto</sub>) conformations  
238 (Henderson et al., 2020). We hypothesized that the COV2-3434 binding site is accessible only  
239 when the RBD adopts an ‘up’ state conformation of S6P<sub>ecto</sub>. To test this model, we quantified  
240 binding of COV2-3434 to S6P<sub>ecto</sub> or S6P<sub>ecto</sub>-2C proteins by ELISA. For comparison, we also  
241 included a mAb that binds to RBD in either the up or down conformational state (COV2-2130), a  
242 mAb that binds to NTD (COV2-2676), and the negative-control dengue mAb DENV-r2D22. As  
243 expected, the binding of COV2-3434 to S6P<sub>ecto</sub>-2C protein was reduced, confirming that the



244 epitope is cryptic and only accessible when at least one RBD is in its ‘up’ conformation (**Fig.**  
245 **5D**).

246

247 **SARS-CoV-2 mRNA vaccines can induce trimer-disrupting antibodies.** Although we  
248 identified a new antigenic site by isolating COV2-3434 from a SARS-CoV-2 convalescent  
249 donor, it is uncertain if this class of antibodies forms a major part of the humoral immune  
250 response to the S protein trimer. To address this question, we performed a competition-binding  
251 ELISA with serum antibody and COV2-3434. Serum antibodies from each of 4 naturally SARS-  
252 CoV-2 infected individuals or from each of 5 individuals before or after SARS-CoV-2 mRNA  
253 vaccination were tested. We observed up to 90% serum antibody competition with COV2-3434  
254 in 3 donors tested following vaccination, indicating that in some individuals SARS-CoV-2  
255 mRNA vaccination generates high levels of S protein trimer-interface (TI) specific antibodies or  
256 antibodies that compete with TI antibodies (**Fig. 5E**). In contrast, we did not observe this level of  
257 competition with COV2-3434 in serum from convalescent donors. Taken together, these results  
258 suggest that S trimer interface antibodies may be more common in the serum of vaccinated than  
259 infected individuals. The reason this class of antibodies was observed in the serum of vaccinees  
260 but not convalescent individuals is not clear, although engineered vaccine S antigen differs from  
261 the natural S protein in that the “pre-fusion” S conformation was stabilized in the vaccine  
262 construct by mutagenesis.

263

264 **COV2-3434 inhibits VOC and confers partial protection against SARS-CoV-2 infection.**

265 Identification of neutralizing mAbs that bind to distinct antigenic sites on S proteins might help  
266 to avoid escape from neutralization by VOC. To address this idea, we used VSV-S viruses



267 expressing SARS-CoV-2 S protein variants that were resistant to neutralization by the RBD-  
268 specific antibodies COV2-2479, COV2-2499 or COV2-2130 (Greaney et al., 2021) or resistant  
269 to the NTD-specific antibodies COV2-2676 and COV2-2489 (Suryadevara et al., 2021). The  
270 COV2-3434 mAb neutralized all escape VSV viruses at the higher concentration tested (**Fig.**  
271 **6A**).

272  
273 We next assessed the ability of COV2-3434 to protect K18-hACE2-transgenic mice following  
274 viral challenge with SARS-CoV-2 (Golden et al., 2020; Oladunni et al., 2020; Winkler et al.,  
275 2021). One day prior to virus inoculation, we passively transferred ~10 mg/kg (200 µg/mouse) of  
276 COV2-2196 (RBD-specific), COV2-3434 (NTD-specific) or DENV-r2D22 (negative control)  
277 mAbs. Mice that received r2D22 lost more than 20% initial body weight. Animals treated with  
278 the RBD mAb COV2-2196 were completely protected from weight loss. COV2-3434 conferred  
279 intermediate protection against weight loss (**Fig. 6B**). Pre-treatment with COV2-3434 also  
280 partially protected against viral burden, with a 7-fold lower level of infectious virus in the lung  
281 compared to the negative-control antibody (**Fig 6C**). We repeated the study by passively  
282 transferring a higher dose (1 mg/mouse) of COV2-2196 (RBD-specific), COV2-3434 (NTD-  
283 specific) or DENV-r2D22 (negative control) mAbs, and again saw a comparable reduction of  
284 viral titers in the lungs and nasal turbinates (**Fig. S8**).

## 285 **DISCUSSION**

286 Human neutralizing mAbs to SARS-CoV-2 isolated from recovered COVID-19 individuals are  
287 of great importance as potential therapeutic candidates. The continued investigation into  
288 identifying protective epitopes using mAbs as we have done here may inform future structure-  
289 based rational design of next-generation SARS-CoV-2 vaccines by revealing protective sites  
290 whose structure should be preserved in engineered vaccine antigens. Most potently neutralizing  
291 SARS-CoV-2 mAbs discovered to date recognize the RBD region, while some moderately  
292 neutralizing NTD-directed mAbs also were identified (Barnes et al., 2020; Baum et al., 2020;  
293 Cerutti et al., 2021b; Chen et al., 2021b; Chi et al., 2020; Dong et al., 2021; Hansen et al., 2020;  
294 McCallum et al., 2021; Pinto et al., 2020; Rogers et al., 2020; Shi et al., 2020; Suryadevara et al.,  
295 2021; Turner et al., 2021c; Zost et al., 2020a). All of the NTD-reactive mAbs reported to date  
296 have lost their neutralizing capacity against certain emerging VOC. The majority of antibodies  
297 identified against NTD target an antigenic site termed the NTD ‘supersite’ (Cerutti et al., 2021b;  
298 Chi et al., 2020; McCallum et al., 2021; Suryadevara et al., 2021). Although a few other  
299 antigenic sites on NTD have been described, mAbs binding to these sites generally were non-  
300 neutralizing. The frequent occurrence of mutations in the NTD of multiple circulating SARS-  
301 CoV-2 variants suggests that the NTD is under strong selective pressure from the host humoral  
302 immune response (Weisblum et al., 2020). Furthermore, antigenic changes caused by deletions in  
303 NTD have been identified within the antigenic supersite of viruses shed by immunocompromised  
304 hosts (Avanzato et al., 2020; Choi et al., 2020; McCarthy et al., 2021).

305

306 In this work, we report the isolation and characterization of SARS-CoV-2 neutralizing mAbs  
307 targeting the NTD using LIBRA-seq. We used NTD, a domain cloned from the full-length spike,

308 as antigen bait for isolating memory B cells from a convalescent donor. More than 90% of the  
309 clones we selected by LIBRA-seq for expression reacted exclusively with NTD, and these  
310 findings also were supported by reactivity studies with the SARS-CoV-2 S6P<sub>ecto</sub> domain. A  
311 subset of eight NTD-targeting antibodies selected by LIBRA-seq was neutralizing. Several of the  
312 mAbs potentially neutralized VSV-S. The primary target for most of the neutralizing antibodies  
313 identified is the NTD ‘supersite’, as previously described by several groups (Cerutti et al.,  
314 2021b; McCallum et al., 2021; Shi et al., 2020; Suryadevara et al., 2021). Most of these NTD-  
315 supersite-targeting antibodies appear to be members of a public clonotype. Although diverse  
316 public clonotypes recognizing RBD or NTD have been described, we identified an *IGHV1-24*-  
317 encoded clonotype that seems to dominate the response to NTD. Clones from this public  
318 clonotype are seen following both vaccination and infection.

319

320 We also identified an antibody designated COV2-3434 that recognizes a distinct antigenic site on  
321 NTD that may represent a new site of vulnerability on SARS-CoV-2 spike. COV2-3434 binds to  
322 recombinant SARS-CoV-2 S6P<sub>ecto</sub> protein weakly in ELISA, but more avidly to cell-surface-  
323 displayed spike on Vero cells infected with VSV-S. In contrast to other NTD-reactive potentially  
324 neutralizing antibodies, COV2-3434 weakly inhibits infection of VSV-S and authentic SARS-  
325 CoV-2 viruses. With these distinctive phenotypes, we tried to learn more about the mode of  
326 recognition of this antigenic site by ns-EM of antigen-antibody complexes. Unexpectedly, we  
327 found that COV2-3434 Fab disrupted SARS-CoV-2 S trimers when added to make spike-Fab  
328 complexes. This finding of trimer disassociation mediated by COV2-3434 revealed a potential  
329 site of vulnerability hidden in the S trimer interface. Similarly, a recently identified NTD-  
330 reactive neutralizing antibody called 5-7 also recognizes a distinct antigenic site within the NTD,

331 antibodies of this class insert an antibody hypervariable loop into the exposed hydrophobic  
332 pocket between the two sheets of the NTD  $\beta$ -sandwich (Cerutti et al., 2021a). This pocket was  
333 described previously as the binding site for metabolites such as heme with hydrophobic  
334 properties (Rosa et al., 2021). Our alanine scan mutagenesis data reveals that COV2-3434 shares  
335 some contact residues with mAb 5-7 including F175 and L176, while L226 is barely deeper than  
336 175 and 176. However, COV2-3434 also lost its binding capacity when deeper pocket residues  
337 F43 and was mutated. We noted that in the spike trimer, residue F43 lies at an interface between  
338 adjacent monomers such that MAb binding could initiate a destabilization of the trimer.

339

340 Recently several reports about mAbs targeting the trimer interface of multiple viral antigens have  
341 been published. For instance, the non-neutralizing influenza mAbs FluA20 and 5J6 that  
342 recognize the hemagglutinin trimer interface (Bangaru et al., 2019; Zost et al., 2021) were  
343 identified from influenza-vaccinated individuals. Also, epitope mapping using polyclonal serum  
344 from vaccinated rabbits identified antibodies recognizing the HIV envelope glycoprotein trimer  
345 interface (Turner et al., 2021a). Similarly, the epitope for a neutralizing mAb for human  
346 metapneumovirus (MPV458) lies within the trimeric interface of pneumovirus fusion proteins  
347 (Huang et al., 2020).

348

349 COV2-3434 is a rare SARS-CoV-2 S trimer interface antibody that mediates virus neutralization.  
350 Our COV2-3434 competition data suggest that this class of mAbs may be common in the serum  
351 of some vaccinated individuals. Hence, surveillance of this class of antibodies and understanding  
352 its contribution to vaccine protection is important, particularly in the context of emergence of

353 new VOC and updated vaccine designs. While these trimer-interface mAbs do not all neutralize  
354 virus *in vitro*, passive transfer of these mAbs can mitigate severe disease. For example, the  
355 FluA20 mAb did not neutralize influenza, but still conferred protection in mice challenged with  
356 H1N1 A/California/04/2009 virus (Bangaru et al., 2019). Here, the moderately neutralizing  
357 COV2-3434 conferred partial protection against weight loss and lung infection in mice when  
358 given as prophylaxis.

359 In summary, using LIBRA-seq, we identified the mAb COV2-3434 that binds to a distinct  
360 antigenic site on the NTD and disassociates S trimers by contacting critical residues in a cryptic  
361 hydrophobic pocket in the S trimer interface.

362

363 **ACKNOWLEDGEMENTS.** We thank Merissa Mayo and Norma Suazo Galeano for human  
364 subject's regulatory support. EM data collection was conducted at the Center for Structural  
365 Biology Cryo-EM Facility at Vanderbilt University. This work was supported by the  
366 NIAID/NIH grants R01 AI157155 (M.S.D. and J.E.C.), R01 AI131722-S1 (I.S.G.), HHSN  
367 contracts 75N93019C00074 (J.E.C.) and 75N93019C00073 (B.J.D.), DARPA grant HR0011-18-  
368 2-0001 (J.E.C.), the Dolly Parton COVID-19 Research Fund at Vanderbilt (J.E.C.), Hays  
369 Foundation COVID-19 Research Fund (I.S.G.), and Fast Grants, Mercatus Center, George  
370 Mason University (J.E.C. and I.S.G.). J.E.C. is a recipient of the 2019 Future Insight Prize from  
371 Merck KGaA. J.B.C. is supported by a Helen Hay Whitney Foundation postdoctoral fellowship.  
372 We thank Dr. Jason McLellan for a gift of S6P<sub>ecto</sub> protein used in the LIBRAseq studies.  
373 Recombinant SARS-CoV-2 S NTD protein was kindly provided by P. McTamney, K. Ren and  
374 A. Barnes (AstraZeneca). The content is solely the responsibility of the authors and does not  
375 represent the official views of the U.S. government or other sponsors.

376 **DECLARATION OF INTERESTS.** M.S.D. is a consultant for Inbios, Vir Biotechnology,  
377 Senda Biosciences, and Carnival Corporation, and is on the Scientific Advisory Boards of  
378 Moderna and Immunome. The Diamond laboratory has received unrelated funding support in  
379 sponsored research agreements from Vir Biotechnology, Moderna, and Emergent BioSolutions.  
380 A.R.S. and I.S.G. are co-founders of AbSeek Bio. The Georgiev laboratory at Vanderbilt  
381 University Medical Center has received unrelated funding from Takeda Pharmaceuticals. C.N.S.,  
382 E.D., and B.J.D. are employees of Integral Molecular, and B.J.D. is a shareholder in that  
383 company. J.E.C. has served as a consultant for Eli Lilly, GlaxoSmithKline and Luna Biologics,  
384 is a member of the Scientific Advisory Boards of Meissa Vaccines and is Founder of  
385 IDBiologics. The Crowe laboratory at Vanderbilt University Medical Center has received  
386 unrelated sponsored research agreements from Takeda, IDBiologics and AstraZeneca.

387

388 **AUTHOR CONTRIBUTIONS.** Conceived of the project: N.S., J.E.C.; Obtained funding:  
389 M.S.D., I.S.G and J.E.C. Performed laboratory experiments: N.S., A.S., R.E.C., E.B., L.V.B.,  
390 J.B.C., K.K., L.M., A.T., S.M.D., L.S.H., R.N., C.N.S., E.D., Supervised research: B.J.D., I.G.,  
391 R.H.C., J.E.C. Wrote the first draft of the paper: N.S., J.E.C.; All authors reviewed and approved  
392 the final manuscript.

393

394 **FIGURE LEGENDS**

395

396 **Figure 1. Characterization of SARS-CoV-2 antibodies in convalescent patient samples.**

397 **A.** Serum or plasma antibody reactivity for the four SARS-CoV-2 convalescent patients and one  
398 non-immune healthy control subject were assessed by ELISA using SARS-CoV-2 S6P<sub>ecto</sub>, S<sub>RBD</sub>,  
399 S<sub>NTD</sub>, SARS-CoV S2P<sub>ecto</sub> or PBS. Optical density was measured with a 450-nm filter (OD<sub>450</sub>)  
400 using a microplate reader. Error bars, s.d.; data are representative of at least two independent  
401 experiments performed in technical duplicate. **B.** Plasma or serum neutralizing activity against  
402 the VSV-S for SARS-CoV-2 convalescent donor 1989 on day 18, 28, 56 or day 90 in an RTCA  
403 neutralization assay. Data represent two experiments performed in technical duplicate. **C.** Plasma  
404 or serum neutralizing activity against the WA1/2020 strain SARS-CoV-2 for convalescent donor  
405 1989 on day 18, 28, 56 or day 90 using a FRNT. Data represent experiments performed in  
406 technical duplicate. Data represent two experiments performed in technical duplicate.

407 **Figure 2. Reactivity, functional and genetic features of 102 human mAbs identified using**  
408 **LIBRA-seq.**

409 **A.** LIBRA seq scores for all cells per experiment are shown as black circles from three different  
410 LIBRA-seq runs. Antibodies that demonstrated either full and partial neutralization in the high-  
411 throughput RTCA assay are highlighted in green or purple, respectively.

412 **B.** MAb specificity or reactivity for each of four S proteins or subdomains. The figure shows a  
413 heatmap for binding of 102 mAbs expressed recombinantly, representing OD values collected at  
414 450 nm for each antigen (range, 0.5 to 4.0). White indicates a lack of detectable binding, blue  
415 indicates binding, and darker blue indicates higher OD values. To the right are the antibody  
416 numbers that demonstrated either full or partial neutralization in the high-throughput RTCA  
417 assay, highlighted in green or purple, respectively.

418 **C.** Genetic characteristics for mAbs that demonstrated either full or partial neutralization along  
419 with their ELISA reactivity; numbers in the boxes represent OD values collected at 450 nm  
420 (range, 0.5 to 4.0) and LIBRA-seq scores for each antigen. White fill indicates no or low  
421 reactivity, red (ELISA) or purple (LIBRA-seq) fill represent reactivity for the respective  
422 antigens.

423



424 **Figure 3. Activity of neutralizing mAbs against SARS-CoV-2.**

425 **A.** ELISA binding to SARS-CoV-2 S6P<sub>ecto</sub> protein was measured by absorbance at 450 nm.  
426 Antibody concentrations starting at 20 µg/mL were used and titrated two-fold. Calculated  
427 EC<sub>50</sub> values are shown on the graph. Error bars indicate standard deviation; data represent at  
428 least two independent experiments performed in technical duplicate.

429 **B.** Binding to the surface of VSV-S-infected Vero cells was measured using flow cytometry and  
430 median fluorescence intensity values were determined for dose-response binding curves. Antibody  
431 was diluted 3-fold starting from 20 µg/mL. Data represent two experiments performed in  
432 technical triplicate.

433 **C.** VSV-S neutralization curves for mAbs that were expressed after high throughput RTCA  
434 neutralization conformation. Calculated IC<sub>50</sub> values are shown on the graph. Error bars indicate  
435 standard deviation; data represent at least two independent experiments performed in technical  
436 duplicate.

437 **D.** Neutralization curves for COV2-3434 or COV2-2196 against SARS-CoV-2 virus. Calculated  
438 IC<sub>50</sub> values are shown on the graph. Error bars indicate standard deviation; data represent at least  
439 two independent experiments performed in technical duplicate.

440 **E.** Germline-revertant (GR) COV2-3443 antibody reactivity and functional activity, ELISA  
441 binding to SARS-CoV-2 S6P<sub>ecto</sub> protein was measured by absorbance at 450 nm and binding to  
442 the surface of VSV-S-infected Vero cells was measured using flow cytometry and median  
443 fluorescence intensity values were determined for dose response binding curves.

444 **F.** VSV-S neutralization curves for germline-revertant COV2-3443 antibody. Error bars indicate  
445 standard deviation; data represent at least two independent experiments performed in technical  
446 duplicate.

447

448 **Figure 4. Epitope identification and structural characterization of COV2-3439 and COV2-**  
449 **3434 antibodies.**

450 **A.** Competition of the panel of neutralizing mAbs with previously mapped antibodies COV2-  
451 2130, COV2-2196, COV2-2676, COV2-2489, r4A8 or rCR3022. Unlabeled antibodies applied  
452 to antigen first are indicated on the left, while biotinylated antibodies that were added to antigen-  
453 coated wells second are listed across the top. The number in each box represents the percent  
454 competition binding of the biotinylated antibody in the presence of the indicated competing  
455 antibody. Heat map colors range from dark grey (100% binding of the biotinylated antibody) to  
456 white (0% or no binding of the biotinylated antibody). The experiment was performed in  
457 biological replicate. Biological replicate from representative single experiment shown.

458 **B.** Negative-stain EM of SARS-CoV-2 S6P<sub>ecto</sub> protein in complex with COV2-3439 Fab. Side  
459 view and top view of superimposed 3D volume COV2-3439 Fab–S6P<sub>ecto</sub> closed trimer (S protein  
460 model PDB:7JJI) complexes as visualized by negative-stain EM for COV2-2676 Fab model in  
461 gold, COV2-2489 Fab model in grey. At the bottom, negative-stain 2D classes of SARS-CoV-2  
462 S protein incubated with COV2-3439 Fab are shown. Data are from a single experiment; detailed  
463 collection statistics are provided in Supplementary Table 3.

464 **C.** Morgagni images of SARS-CoV-2 S6P<sub>ecto</sub> protein only, immediately after COV2-3434 Fab  
465 was added to SARS-CoV-2 S6P<sub>ecto</sub> trimer, incubated for 1, 5, 30 mins or 1 hr and placed on an  
466 nsEM grid.

467 **D.** Negative-stain 2D classes of SARS-CoV-2 S6P<sub>ecto</sub> protein only or COV2-3434 Fab with a  
468 monomer of SARS-CoV-2 S6P<sub>ecto</sub> protein (based on the density surrounding the Fab).

469 **Figure 5. Structural characterization of the trimer-disrupting antibody COV2-3434.**

470 **A.** Residues identified as important for COV2-3434 binding are highlighted as spheres on the S  
471 protein structure (green ribbon; PDB 7L2C) F43 (magenta), F175, L176 (cyan), or L226  
472 (orange). Residues critical for COV2-3434 binding were identified from binding screens of an  
473 alanine scanning mutagenesis library of NTD.

474 **B.** MAb binding values for COV2-3434, COV2-3439, and control anti-NTD mAb COV2-2305  
475 are shown at SARS-CoV-2 S protein clones identified as critical for MAb binding. MAb  
476 reactivities for each mutant are expressed as percent of binding to wild-type S protein, with  
477 ranges (half of the maximum minus minimum values). Two replicate values were obtained for  
478 each experiment.

479 **C.** Negative-stain EM of SARS-CoV-2 rNTD protein in complex with COV2-3439 and COV2-  
480 3434 Fabs. Top view and side view of superimposed 3D volume COV2-3434 Fab - COV2-3439  
481 Fab - SARS-CoV-2 rNTD complexes as visualized by negative-stain EM aligned to S protein of  
482 SARS-CoV-2 in complex with 4A8 (PDB: 7C2L) Data are from a single experiment; detailed  
483 collection statistics are provided in Supplementary Table 3.

484 **D.** ELISA binding to SARS-CoV-2 S6P<sub>ecto</sub> or SARS-CoV-2 S6P-2C was measured by  
485 absorbance at 450 nm. The COV2-2130 starting concentration was 200 ng/mL, the COV2-2676  
486 and COV2-3434 starting concentrations were 20 µg/mL, and mAbs were titrated two-fold.  
487 Calculated EC<sub>50</sub> values are shown on the graph. Error bars indicate standard deviation; data  
488 represent at least two independent experiments performed in technical duplicate.

489 **E.** Measurement of serum antibody competition with trimer interface antibody COV2-3434 in  
490 individuals before or after SARS-CoV-2 mRNA vaccination. Competition-binding ELISA

491 curves for COV2-3434 with human serum from convalescent or vaccinated donors. Competition-  
492 binding experiments were performed for each sample in triplicate and repeated in at least 2  
493 independent experiments. One representative experiment is shown. For all competition-binding  
494 curves, data points indicate the mean and error bars indicate the standard deviation.

495 **Figure 6. Escape virus neutralization and protection in K18 hACE2 transgenic mice by**  
496 **trimer-disrupting antibody COV2-3434.**

497 **A.** Neutralization of mAb escape viruses selected by RBD-specific mAbs COV2-2479 (red),  
498 COV2-2130 (green), COV2-2094 (magenta) or COV2-2499 (purple) and NTD-specific mAbs  
499 COV2-2676 (blue) or COV2-2489 (cyan) and with VSV-S by COV2-3434 or COV2-2196  
500 (positive control). Mutations selected by those mAbs are listed with the references. Toward the  
501 right, the RTCA curves show neutralization of those escape viruses, The \* symbol indicates lack  
502 of neutralization in wells with only virus and no antibody.

503 **B.** Eight-week-old male K18-hACE2 transgenic mice were inoculated by the intranasal route  
504 with  $10^4$  FFU of SARS-CoV-2 (WA1/2020 D614G). One day prior to virus inoculation, mice  
505 were given a single 200  $\mu$ g (~10 mg/kg) dose of COV2-3434 or COV2-2196 by intraperitoneal  
506 injection. Weight change was monitored daily. Data are from two independent experiments,  
507 n=10 per group. \*\*, p<0.01; \*\*\*\*, p<0.0001. Error bars represent SEM.

508 **C.** At 6 dpi, lungs were collected and assessed for infectious viral burden by plaque assay.  
509 Plaque-forming units (PFU)/g is shown. Bars indicate the mean viral load; the dotted line  
510 indicates the limit of detection of the assay. Data are from two independent experiments, n=10  
511 per group. \*\*, p<0.01; \*\*\*\*, p<0.0001.

512

513

514

515

516 **STAR METHODS**

517

518 **RESOURCE AVAILABILITY**

519 **LEAD CONTACT.** Further information and requests for resources and reagents should be  
520 directed to and will be fulfilled by the Lead Contact, James E. Crowe, Jr. ([james.crowe@vumc.org](mailto:james.crowe@vumc.org)).

521

522 **MATERIALS AVAILABILITY.** Materials described in this paper are available for  
523 distribution for nonprofit use using templated documents from Association of University  
524 Technology Managers “Toolkit MTAs”, available at: [https://autm.net/surveys-and-](https://autm.net/surveys-and-tools/agreements/material-transfer-agreements/mta-toolkit)  
525 [tools/agreements/material-transfer-agreements/mta-toolkit](https://autm.net/surveys-and-tools/agreements/material-transfer-agreements/mta-toolkit).

526

527 **DATA AND CODE AVAILABILITY.** All data needed to evaluate the conclusions in the paper  
528 are present in the paper or the Supplemental Information. The antibodies in this study are  
529 available by Material Transfer Agreement with Vanderbilt University Medical Center.

530

531 **EXPERIMENTAL MODEL AND SUBJECT DETAILS**

532 **Research participants.** We studied the peripheral blood B cells from four individuals with a  
533 history of laboratory-confirmed symptomatic SARS-CoV-2 infection. The study was approved  
534 by the Institutional Review Board of Vanderbilt University Medical Center and specimens were  
535 obtained after written informed consent.

536

537 **Cell lines.** Vero (ATCC, CCL-81), HEK293 (ATCC, CRL-1573) and HEK293T (ATCC, CRL-  
538 3216) cells were maintained at 37°C in 5% CO<sub>2</sub> in Dulbecco's minimal essential medium  
539 (DMEM) containing 10% (v/v) heat-inactivated fetal bovine serum (FBS), 10 mM HEPES pH  
540 7.3, 1 mM sodium pyruvate, 1× non-essential amino acids and 100 U/mL of penicillin-  
541 streptomycin. Vero-furin cells were obtained from T. Pierson (NIAID, NIH) and have been  
542 described previously (45) Vero-hACE2-TMPRSS2 cells were a gift of A. Creanga and B.  
543 Graham (Vaccine Research Center, NIH). FreeStyle 293F cells (Thermo Fisher Scientific,  
544 R79007) were maintained at 37°C in 8% CO<sub>2</sub>. Expi293F cells (Thermo Fisher Scientific,  
545 A1452) were maintained at 37°C in 8% CO<sub>2</sub> in Expi293F Expression Medium (Thermo Fisher  
546 Scientific, A1435102). ExpiCHO cells (Thermo Fisher Scientific, A29127) were maintained at  
547 37°C in 8% CO<sub>2</sub> in ExpiCHO Expression Medium (Thermo Fisher Scientific, A2910002).  
548 Mycoplasma testing of Expi293F and ExpiCHO cultures was performed monthly using a PCR-  
549 based mycoplasma detection kit (ATCC, 30-1012K).

550

551 **Antigen purification.** A variety of recombinant soluble protein antigens were used in the  
552 LIBRA-seq experiment and other experimental assays. For the LIBRA-seq experiment, we used  
553 the S6Pecto construct. This plasmid encoded residues 1–1,208 of the SARS-CoV-2 S protein  
554 with a mutated S1/S2 cleavage site, proline substitutions at positions 817, 892, 899, 942, 986 and  
555 987, and a C-terminal T4-fibrin trimerization motif, an 8x HisTag, and a TwinStrepTag (SARS-  
556 CoV-2 spike HP). DNA encoding this construct was transiently transfected with PEI in  
557 Expi293F cells and after six days of expression, supernatants were harvested, and protein was



558 affinity-purified over a StrepTrap HP column (Cytiva Life Sciences). Protein was further  
559 resolved to homogeneity over a Superose 6 Increase column (GE Life Sciences).

560

561 We generated a plasmid containing a synthesized cDNA encoding a protein designate SARS -  
562 CoV-2 S-2P that possessed residues 1–1,208 of the SARS-CoV-2 spike protein as described  
563 ((Wrapp et al., 2020)46) with a mutated S1/S2 cleavage site, proline substitutions at amino acid  
564 positions 986 and 987, a C-terminal T4-fibrin trimerization motif, an 8x HisTag, and a  
565 TwinStrepTag. The plasmids were transiently transfected into FreeStyle 293F cells (Thermo  
566 Fisher Scientific) using polyethylenimine. The design of the two-proline (2P) forms of the  
567 coronavirus trimer spike antigens results in a prefusion-stabilized conformation that better  
568 represents neutralization-sensitive epitopes in comparison to their wild-type forms. Two h after  
569 transfection, cells were treated with kifunensine to ensure uniform glycosylation. Transfected  
570 supernatants were harvested after 6 days of expression.

571 SARS-CoV-2 S1 (cat. no: 40591-V08B1), SARS-CoV-2 S2 (cat. no: 40590-V08B), SARS-CoV-  
572 2 RBD (cat. no: 40592-V05H) and SARS-CoV-2 NTD (cat. no: 40591-V41H-B-20) truncated  
573 proteins were purchased (Sino Biological).

574

575 A gene encoding the ectodomain of a pre-fusion conformation-stabilized SARS-CoV-2 S protein  
576 ectodomain (S6Pecto) (Hsieh et al., 2020) was synthesized and cloned into a DNA plasmid  
577 expression vector for mammalian cells. A similarly designed S protein antigen with two prolines  
578 and removal of the furin cleavage site for stabilization of the prefusion form of S (S2Pecto) was  
579 reported previously (Wrapp et al., 2020). In brief, this gene includes the ectodomain of SARS-

580 CoV-2 (to residue 1,208), a T4 fibritin trimerization domain, an AviTag site-specific  
581 biotinylation sequence and a C-terminal 8× His tag. To stabilize the construct in the pre-fusion  
582 conformation, we included substitutions F817P, A892P, A899P, A942P, K986P and V987P and  
583 mutated the furin cleavage site at residues 682–685 from RRAR to ASVG. The recombinant  
584 S6Pecto protein was isolated by metal affinity chromatography on HisTrap Excel columns  
585 (Cytiva), and protein preparations were purified further by size-exclusion chromatography on a  
586 Superose 6 Increase 10/300 column (Cytiva). The presence of trimeric, pre-fusion conformation  
587 S protein was verified by negative-stain electron microscopy (Zost et al., 2020b). For electron  
588 microscopy with S protein and Fabs, we expressed a variant of S6Pecto lacking an AviTag but  
589 containing a C-terminal Twin-Strep-tag, similar to that described previously (Zost et al., 2020b).  
590 Expressed protein was isolated by metal affinity chromatography on HisTrap Excel columns  
591 (Cytiva), followed by further purification on a StrepTrap HP column (Cytiva) and size-exclusion  
592 chromatography on TSKgel G4000SWXL (TOSOH).

593

594 **Mouse models.** Animal studies were carried out in accordance with the recommendations in the  
595 Guide for the Care and Use of Laboratory Animals of the National Institutes of Health. The  
596 protocols were approved by the Institutional Animal Care and Use Committee at the Washington  
597 University School of Medicine (assurance number A3381–01). Virus inoculations were  
598 performed under anesthesia that was induced and maintained with ketamine hydrochloride and  
599 xylazine, and all efforts were made to minimize animal suffering. Heterozygous K18-hACE  
600 c57BL/6J mice (strain: 2B6.Cg-Tg(K18-ACE2)2Prlmn/J) were obtained from Jackson  
601 Laboratory (034860). Eight to nine week-old mice of both sexes were inoculated with 103 PFU  
602 of SARS-CoV-2 by an intranasal route.

603

604 **DNA-barcoding of antigens:**

605 We used oligonucleotides that possess a 15-basepair antigen barcode, a sequence capable of

606 annealing to the template-switch oligonucleotide that is part of the 10X Genomics bead-delivered

607 oligonucleotides and contain truncated TruSeq small RNA read-1 sequences in the following

608 structure: 5'-

609 CCTTGGCACCCGAGAATTCCANNNNNNNNNNNNNCCCATATAAGA\*A\*A-3', where

610 Ns represent the antigen barcode as previously described (Setliff et al., 2019). For each antigen, a

611 unique DNA barcode was directly conjugated to the antigen itself. In particular, 5' amino-

612 oligonucleotides were conjugated directly to each antigen using the SoluLINK Protein-

613 Oligonucleotide Conjugation Kit (TriLink cat. no. S-9011) according to manufacturer's

614 instructions. Briefly, the oligonucleotide and protein were desalted, and then the amino-oligo

615 was modified with the 4FB crosslinker, and the biotinylated antigen protein was modified with

616 S-HyNic. Then, the 4FB-oligo and the HyNic-antigen were mixed. This action causes a stable

617 bond to form between the protein and the oligonucleotide. The concentration of the antigen-oligo

618 conjugates was determined by a BCA assay, and the HyNic molar substitution ratio of the

619 antigen-oligo conjugates was analyzed using a NanoDrop instrument according to the SoluLINK

620 protocol guidelines. Chromatography separation on an AKTA FPLC instrument was used to

621 remove excess oligonucleotide from the protein-oligo conjugates, which were also verified using

622 SDS-PAGE with a silver stain. Antigen-oligo conjugates also were used in flow cytometry

623 titration experiments.

624

625 **METHOD DETAILS**

626 **Antigen-specific B cell sorting.** Cells were stained and mixed with DNA-barcoded antigens and  
627 other antibodies, and then sorted using fluorescence activated cell sorting (FACS). First, cells  
628 were counted, and viability was assessed using Trypan Blue. Then, cells were washed three  
629 times with DPBS supplemented with 0.1% bovine serum albumin (BSA). Cells were  
630 resuspended in DPBS-BSA and stained with cell markers including viability dye (Ghost Red  
631 780), CD14-APC-Cy7, CD3-FITC, CD19-BV711, and IgG-PE-Cy5. Additionally, antigen-oligo  
632 conjugates were added to the stain. After staining in the dark for 30 min at room temperature,  
633 cells were washed three times with DPBS-BSA at 300 x g for five min. Cells then were  
634 incubated for 15 min at room temperature with Streptavidin-PE to label cells with bound antigen.  
635 Cells were washed three times with DPBS-BSA, resuspended in DPBS, and sorted by FACS.  
636 Antigen-positive cells were bulk sorted and delivered to the Vanderbilt Technologies for  
637 Advanced Genomics (VANTAGE) sequencing core laboratory at an appropriate target  
638 concentration for 10X Genomics library preparation and subsequent sequence analysis. FACS  
639 data were analyzed using FlowJo™ Software (Mac) version 10.6 (Becton, Dickinson).

640

641 **Sample preparation, library preparation, and sequencing.** Single-cell suspensions were  
642 loaded onto a Chromium Controller microfluidics device (10X Genomics) and processed using  
643 the B-cell Single Cell V(D)J solution according to manufacturer's suggestions for a target  
644 capture of 10,000 B cells per 1/8 10X cassette, with minor modifications to intercept, amplify  
645 and purify the antigen barcode libraries as previously described (Setliff et al., 2019).

646

647 **Sequence processing and bioinformatic analysis.** We used our previously described pipeline to  
648 use paired-end FASTQ files of oligo libraries as input, process and annotate reads for cell  
649 barcode, UMI, and antigen barcode, and generate a cell barcode - antigen barcode UMI count  
650 matrix ((Setliff et al., 2019; Shiakolas et al., 2021). BCR contigs were processed using Cell  
651 Ranger software (10X Genomics) using GRCh38 as reference. Antigen barcode libraries were  
652 also processed using Cell Ranger. The overlapping cell barcodes between the two libraries were  
653 used as the basis of the subsequent analysis. We removed cell barcodes that had only non-  
654 functional heavy chain sequences and cells with multiple functional heavy chain sequences  
655 and/or multiple functional light chain sequences, reasoning that these may be multiplets.  
656 Additionally, we aligned the BCR contigs (filtered\_contigs.fasta file output by Cell Ranger, 10X  
657 Genomics) to IMGT reference genes using HighV-Quest (Alamyar et al., 2012). The output of  
658 HighV-Quest was parsed using ChangeO (Gupta et al., 2015) and merged with an antigen  
659 barcode UMI count matrix. Finally, we determined the LIBRA-seq score for each antigen in the  
660 library for every cell as previously described (Setliff et al., 2019).

661

662 **High-throughput antibody expression.** For high-throughput production of recombinant  
663 antibodies, approaches were used that are designated as microscale. For antibody expression,  
664 microscale transfections were performed (~1 mL per antibody) of Chinese hamster ovary  
665 (CHO) cell cultures using the Gibco ExpiCHO Expression System and a protocol for deep 96-  
666 well blocks (Thermo Fisher Scientific). In brief, synthesized antibody-encoding DNA (~2 µg  
667 per transfection) was added to OptiPro serum free medium (OptiPro SFM), incubated with  
668 ExpiFectamine CHO Reagent and added to 800 µL of ExpiCHO cell cultures into 96-deep-well  
669 blocks using a ViaFlo 384 liquid handler (Integra Biosciences). The plates were incubated on an

670 orbital shaker at 1,000 r.p.m. with an orbital diameter of 3 mm at 37°C in 8% CO<sub>2</sub>. The day  
671 after transfection, ExpiFectamine CHO Enhancer and ExpiCHO Feed reagents (Thermo Fisher  
672 Scientific) were added to the cells, followed by 4 d incubation for a total of 5 d at 37°C in 8%  
673 CO<sub>2</sub>. Culture supernatants were collected after centrifuging the blocks at 450 x g for 5 min and  
674 were stored at 4°C until use. For high-throughput microscale antibody purification, fritted deep-  
675 well plates were used containing 25 µL of settled protein G resin (GE Healthcare Life Sciences)  
676 per well. Clarified culture supernatants were incubated with protein G resin for antibody  
677 capturing, washed with PBS using a 96-well plate manifold base (Qiagen) connected to the  
678 vacuum and eluted into 96-well PCR plates using 86 µL of 0.1 M glycine-HCl buffer  
679 pH 2.7. After neutralization with 14 µL of 1 M Tris-HCl pH 8.0, purified antibodies were  
680 buffer-exchanged into PBS using Zeba Spin Desalting Plates (Thermo Fisher Scientific) and  
681 stored at 4°C until use.

682

683 **MAb production and purification.** cDNAs encoding mAbs of interest were synthesized (Twist  
684 Bioscience) and cloned into an IgG1 monocistronic expression vector (designated as pTwist-  
685 mCis\_G1) or Fab expression vector (designated as pTwist-mCis\_FAB) and used for production  
686 in mammalian cell culture. This vector contains an enhanced 2A sequence and GSG linker that  
687 allows for the simultaneous expression of mAb heavy and light chain genes from a single  
688 construct upon transfection (Chng et al., 2015). For antibody production, we performed  
689 transfection of ExpiCHO cell cultures using the Gibco ExpiCHO Expression System as  
690 described by the vendor. IgG molecules were purified from culture supernatants using HiTrap  
691 MabSelect SuRe (Cytiva) on a 24-column parallel protein chromatography system (Protein  
692 BioSolutions).

693

694 Fab proteins were purified using CaptureSelect column (Thermo Fisher Scientific). Purified  
695 antibodies were buffer-exchanged into PBS, concentrated using Amicon Ultra-4 50-kDa (IgG) or  
696 30 kDa (Fab) centrifugal filter units (Millipore Sigma) and stored at 4°C until use. F(ab)<sub>2</sub>  
697 fragments were generated after cleavage of IgG with IdeS protease (Promega) and then purified  
698 using TALON metal affinity resin (Takara) to remove the enzyme and protein A agarose (Pierce)  
699 to remove the Fc fragment. Purified mAbs were tested routinely for endotoxin levels and found  
700 to be less than 30 EU per mg IgG. Endotoxin testing was performed using the PTS201F cartridge  
701 (Charles River), with a sensitivity range from 10 to 0.1 EU per mL, and an Endosafe Nexgen-  
702 MCS instrument (Charles River).

703

704 **ELISA binding assays.** Wells of 96-well microtiter plates were coated with purified  
705 recombinant SARS-CoV-2 S6Pecto, SARS-CoV-2 S NTD, or SARS-CoV-2 RBS protein at  
706 4°C overnight. Plates were blocked with 2% non-fat dry milk and 2% normal goat serum in  
707 Dulbecco's phosphate-buffered saline (DPBS) containing 0.05% Tween-20 (DPBS-T) for 1 h.  
708 The bound antibodies were detected using goat anti-human IgG conjugated with horseradish  
709 peroxidase (HRP) (Southern Biotech, cat. 2040-05, lot B3919-XD29, 1:5,000 dilution) and a  
710 3,3',5,5'-tetramethylbenzidine (TMB) substrate (Thermo Fisher Scientific). Color development  
711 was monitored, 1 M HCl was added to stop the reaction, and the absorbance was measured at  
712 450 nm using a spectrophotometer (Biotek). For dose–response assays, serial dilutions of  
713 purified mAbs were applied to the wells in triplicate, and antibody binding was detected as  
714 detailed above. Half maximal effective concentration (EC<sub>50</sub>) values for binding were determined

715 using Prism v.8.0 software (GraphPad) after log transformation of the mAb concentration using  
716 sigmoidal dose–response nonlinear regression analysis.

717

718 **Cell-surface antigen-display assay.** Vero cell monolayers were monitored until 80% confluent  
719 and then inoculated with VSV-SARS-CoV-2 virus (Wa1/2020 strain) (designated here as VSV-  
720 S) at an MOI of 0.5 in culture medium (DMEM with 2% FBS). For a T-225 flask, 10 mL of  
721 diluted VSV-S virus was added to the monolayer, then incubated for 40 min. During the  
722 incubation, the flask was gently rocked back and forth every 10 min to ensure even infection.  
723 Following, the incubation the flask volume was topped off to 30 mL with 2% FBS containing  
724 DMEM and incubated for 14 h. Cells were monitored for CPE under a microscope, were  
725 trypsinized and washed in FACS buffer. 100,000 infected cells were seeded per well to stain  
726 with respective antibodies. All antibody was diluted to 10 µg/mL in FACS buffer, and then  
727 serially diluted 3-fold 7 times to stain for antibodies that react to cell-surface-displayed S protein.  
728 Infected cells then were resuspended in 50 µL of diluted antibody. Antibody binding was  
729 detected with anti-IgG Alexa-Fluor-647-labelled secondary antibodies. Cells were analyzed on  
730 an iQue cytometer for staining first by gating to identify infected cells as indicated by GFP-  
731 positive cells, and then gated for secondary antibody binding.

732

733 **Focus reduction neutralization test (FRNT).** Serial dilutions of serum/plasma were incubated  
734 with 102 FFU of SARS-CoV-2 for 1 h at 37°C. The antibody-virus complexes were added to  
735 Vero E6 cell-culture monolayers in 96-well plates for 1 h at 37°C. Cells then were overlaid with  
736 1% (w/v) methylcellulose in minimum essential medium (MEM) supplemented to contain 2%



737 heat-inactivated FBS. Plates were fixed 30 h later by removing overlays and fixed with 4%  
738 paraformaldehyde (PFA) in PBS for 20 min at room temperature. The plates were incubated  
739 sequentially with 1  $\mu\text{g}/\text{mL}$  of rCR3022 anti-S antibody or a murine anti-SARS-CoV-2 mAb,  
740 SARS2-16 (hybridoma supernatant diluted 1:6,000 to a final concentration of  $\sim 20$   $\text{ng}/\text{mL}$ ) and  
741 then HRP-conjugated goat anti-human IgG (Sigma-Aldrich, A6029) in PBS supplemented with  
742 0.1% (w/v) saponin (Sigma) and 0.1% BSA. SARS-CoV-2-infected cell foci were visualized  
743 using TrueBlue peroxidase substrate (KPL) and quantitated on an ImmunoSpot 5.0.37 Macro  
744 Analyzer (Cellular Technologies). Half maximal inhibitory concentration ( $\text{IC}_{50}$ ) values were  
745 determined by nonlinear regression analysis (with a variable slope) using Prism software.

746

747 **High-throughput real-time cell analysis (RTCA) neutralization assay.** To screen for  
748 neutralizing activity in the panel of recombinantly expressed mAbs, we used a high-throughput  
749 and quantitative RTCA assay and xCelligence RTCA HT Analyzer (ACEA Biosciences) that  
750 assesses kinetic changes in cell physiology, including virus-induced cytopathic effect (CPE).  
751 Twenty  $\mu\text{L}$  of cell culture medium (DMEM supplemented with 2% FBS) was added to each well  
752 of a 384-well E-plate using a ViaFlo384 liquid handler (Integra Biosciences) to obtain  
753 background reading. Six thousand (6,000) Vero-furin cells in 20  $\mu\text{L}$  of cell culture medium  
754 were seeded per well, and the plate was placed on the analyzer. Sensograms were visualized  
755 using RTCA HT software version 1.0.1 (ACEA Biosciences). For a screening neutralization  
756 assay, equal amounts of virus were mixed with micro-scale purified antibodies in a total volume  
757 of 40  $\mu\text{L}$  using DMEM supplemented with 2% FBS as a diluent and incubated for 1 h at  $37^\circ\text{C}$   
758 in 5%  $\text{CO}_2$ . At  $\sim 17$ – $20$  h after seeding the cells, the virus–mAb mixtures were added to the  
759 cells in 384-well E-plates. Wells containing virus only (in the absence of mAb) and wells

760 containing only Vero cells in medium were included as controls. Plates were measured every 8–  
761 12 h for 48–72 h to assess virus neutralization. Micro-scale antibodies were assessed in four 5-  
762 fold dilutions (starting from a 1:20 sample dilution), and their concentrations were not  
763 normalized. In some experiments, mAbs were tested in triplicate using a single (1:20) dilution.  
764 Neutralization was calculated as the percent of maximal cell index in control wells without virus  
765 minus cell index in control (virus-only) wells that exhibited maximal CPE at 40 to 48 h after  
766 applying virus–antibody mixture to the cells. A mAb was classified as fully neutralizing if it  
767 completely inhibited SARS-CoV-2-induced CPE at the highest tested concentration, while a  
768 mAb was classified as partially neutralizing if it delayed but did not fully prevent CPE at the  
769 highest tested concentration.

770

771 **Conventional throughput neutralization assay.** To determine neutralizing activity of  
772 serum/plasma and IgG, we used real-time cell analysis (RTCA) assay on an xCELLigence  
773 RTCA MP Analyzer (ACEA Biosciences Inc.) that measures virus-induced cytopathic effect  
774 (CPE) (Gilchuk et al., 2020; Zost et al., 2020b). Briefly, 50  $\mu$ L of cell culture medium (DMEM  
775 supplemented with 2% FBS) was added to each well of a 96-well E-plate using a ViaFlo384  
776 liquid handler (Integra Biosciences) to obtain background reading. A suspension of 18,000 Vero-  
777 E6 cells in 50  $\mu$ L of cell culture medium was seeded in each well, and the plate was placed on  
778 the analyzer. Measurements were taken automatically every 15 min, and the sensograms were  
779 visualized using RTCA software version 2.1.0 (ACEA Biosciences Inc). VSV-S (0.01 MOI,  
780 ~120 PFU per well) was mixed 1:1 with a dilution of serum/plasma or mAb in a total volume of  
781 100  $\mu$ L using DMEM supplemented with 2% FBS as a diluent and incubated for 1 h at 37°C in  
782 5% CO<sub>2</sub>. At 16 h after seeding the cells, the virus-mAb mixtures were added in replicates to the

783 cells in 96-well E-plates. For the biliverdin assay, biliverdin was added to the virus at a final  
784 concentration of 25  $\mu$ M before addition to the antibody; similarly, polysorbate-80 was added to  
785 the virus at 0.02% before addition to the antibody. Triplicate wells containing virus only  
786 (maximal CPE in the absence of mAb) and wells containing only Vero cells in medium (no-CPE  
787 wells) were included as controls. Plates were measured continuously (every 15 min) for 48 h to  
788 assess virus neutralization. Normalized cellular index (CI) values at the endpoint (48 h after  
789 incubation with the virus) were determined using the RTCA software version 2.1.0 (ACEA  
790 Biosciences Inc.). Results are expressed as percent neutralization in a presence of respective  
791 mAb relative to control wells with no CPE minus CI values from control wells with maximum  
792 CPE. RTCA IC<sub>50</sub> values were determined by nonlinear regression analysis using Prism  
793 software.

794

795 Electron microscopy sample and grid preparation, imaging and processing of S6Pecto–Fab  
796 complexes. For electron microscopy imaging of spike protein and Fabs, we expressed a variant  
797 of S6Pecto containing a C-terminal Twin-Strep-tag, similar to that described previously (Zost et  
798 al., 2020b). Expressed protein was incubate with BioLock (IBA Lifesciences) and then isolated  
799 by Strep affinity chromatography on StrepTrap HP columns (GE Healthcare). Fabs were  
800 expressed as a recombinant Fab and purify with affinity column. For screening and imaging of  
801 negatively-stained SARS-CoV-2 S6Pecto protein in complex with human Fabs, the proteins were  
802 incubated at a Fab:spike molar ratio of 4:1 for about 1 hour at ambient temperature or overnight  
803 at 4°C, and approximately 3  $\mu$ L of the sample at concentrations of about 10 to 15  $\mu$ g/mL was  
804 applied to a glow-discharged grid with continuous carbon film on 400 square mesh copper  
805 electron microscopy grids (Electron Microscopy Sciences). The grids were stained with 0.75%

806 uranyl formate (Ohi et al., 2004). Images were recorded on a Gatan US4000 4k×4k CCD camera  
807 using an FEI TF20 (TFS) transmission electron microscope operated at 200 keV and control with  
808 Serial EM (Mastronarde, 2005). All images were taken at 50,000× magnification with a pixel  
809 size of 2.18 Å per pixel in low-dose mode at a defocus of 1.5–1.8 μm. The total dose for the  
810 micrographs was around 30e<sup>-</sup>per Å<sup>2</sup>. Image processing was performed using the cryoSPARC  
811 (Punjani et al., 2017) software package. Images were imported, CTF-estimated and particles  
812 were picked. The particles were extracted with a box size of 256 pixels and binned to 128 pixels  
813 (pixel size of 4.36 Å/pix) and 2D class averages were performed (see also Supplementary Table  
814 3 for detailed). For time point of the complex with Fab Cov2-3434, SARS-CoV-2 S6Pecto  
815 protein and the Fab was mixed at ambient temperature and samples of ~3 μL were pulled at the  
816 time points and applied to the grid and stained.

817

818 **Serum antibody competition binding ELISAs with biotinylated reference mAbs.** mAb  
819 COV2-3434 was biotinylated using NHS-PEG4-biotin (Thermo Fisher Scientific, cat# A39259)  
820 according to manufacturer protocol. Following biotinylation, biotinylated COV2-3434 was  
821 titrated in ELISA to verify specific binding and verify if EC<sub>50</sub> was similar to the un-biotinylated  
822 antibody. Serum samples for use in competition ELISA were heat inactivated by incubation at  
823 55°C for 1 hr. ELISAs were performed using 384-well plates that were coated overnight at 1  
824 μg/mL with S6Pecto containing a C-terminal Twin-Strep-tag, similar to that described  
825 previously (Zost et al., 2020b). The following day, plates were washed three times with PBS-T  
826 and blocked with 2% bovine serum albumin (BSA) in PBS containing 0.05% Tween-20  
827 (blocking buffer). Plates were washed three times with PBS-T and two-fold serial dilutions of  
828 donor serum (1:10 initial dilution) or control mAb (20,000 ng/mL initial dilution) in blocking

829 buffer were added to each plate (total volume 25  $\mu$ L/well) and incubated at RT for 1 hr. After  
830 incubation, 5  $\mu$ L of biotinylated COV2-3434 (20  $\mu$ g/mL) in blocking buffer were added directly  
831 to the wells containing the serial dilutions of competing serum or COV2-3434 mAb. The  
832 concentration of biotinylated mAb was calculated to be at approximately the EC90 of the mAb  
833 after addition to an equal volume of competing serum or mAb in the plate. Plates were incubated  
834 for 30 min at RT and then washed three times with PBS-T. After this wash, HRP-conjugated  
835 avidin (Sigma Aldrich, 1:3,500 dilution) in blocking buffer was added and plates were incubated  
836 for 1 h. After incubation, plates were washed three times with PBS-T and 25  $\mu$ L of a 3,3',5,5'-  
837 tetramethylbenzidine (TMB) substrate (Thermo Fisher Scientific) was added to each well. After  
838 sufficient development, the reaction was quenched by addition of 25  $\mu$ L 1 M HCl and the optical  
839 density values were measured at 450 nm wavelength on a BioTek plate reader. For each plate,  
840 background signal (signal from wells that were not coated with antigen) was subtracted and  
841 values were normalized to no-competition controls (signal from wells that had no competing  
842 serum or mAb) Four-parameter dose-response/inhibition curves were fit to the normalized data  
843 using Prism software (GraphPad) v8.1.1. Each dilution of serum or mAb was performed in  
844 triplicate and each experiment was conducted at least twice independently.

845

846 **Protection against SARS-CoV-2 in mice.** Animal studies were carried out in accordance with  
847 the recommendations in the Guide for the Care and Use of Laboratory Animals of the National  
848 Institutes of Health. The protocols were approved by the Institutional Animal Care and Use  
849 Committee at the Washington University School of Medicine (Assurance number A3381-01).  
850 Virus inoculations were performed under anesthesia that was induced and maintained with  
851 ketamine hydrochloride and xylazine, and all efforts were made to minimize animal suffering.

852

853 Female heterozygous K18-hACE C57BL/6J mice were housed in groups of up to 5 mice per  
854 cage at 18 to 24°C ambient temperatures and 40 to 60% humidity. Mice were fed a 20% protein  
855 diet (PicoLab 5053, Purina) and maintained on a 12-h light–dark cycle (06:00 to 18:00). Food  
856 and water were available ad libitum. Mice (8 to 9 weeks old) were inoculated with  $1 \times 10^4$  focus  
857 forming units of SARS-CoV-2 (viral titer was determined on Vero-TMPRSS2-ACE2 cells) via  
858 the intranasal route. Anti-SARS-CoV-2 human mAbs or isotype control mAbs were administered  
859 24 h before (prophylaxis) SARS-CoV-2 inoculation. Weights and lethality were monitored daily  
860 for up to 6 days after inoculation and mice were euthanized at 6 dpi and tissues were collected.

861

862 **Epitope mapping of antibodies by alanine-scanning mutagenesis.** Epitope mapping was  
863 performed essentially as described previously (Davidson and Doranz, 2014) using a SARS-CoV-  
864 2 (strain Wuhan-Hu-1) spike protein NTD shotgun mutagenesis mutation library, made using a  
865 full-length expression construct for spike protein, where 215 residues of the NTD (between spike  
866 residues 9 and 310) were mutated individually to alanine, and alanine residues to serine.  
867 Mutations were confirmed by DNA sequencing, and clones arrayed in a 384-well plate, one  
868 mutant per well. Binding of mAbs to each mutant clone in the alanine scanning library was  
869 determined, in duplicate, by high-throughput flow cytometry. A plasmid encoding cDNA for  
870 each spike protein mutant was transfected into HEK-293T cells and allowed to express for 22 h.  
871 Cells were fixed in 4% (v/v) paraformaldehyde (Electron Microscopy Sciences), and  
872 permeabilized with 0.1% (w/v) saponin (Sigma-Aldrich) in PBS plus calcium and magnesium  
873 (PBS++) before incubation with mAbs diluted in PBS++, 10% normal goat serum (Sigma), and  
874 0.1% saponin. MAb screening concentrations were determined using an independent

875 immunofluorescence titration curve against cells expressing wild-type S protein to ensure that  
876 signals were within the linear range of detection. Antibodies were detected using 3.75 µg/mL of  
877 Alexa-Fluor-488-conjugated secondary antibodies (Jackson ImmunoResearch Laboratories) in  
878 10% normal goat serum with 0.1% saponin. Cells were washed three times with PBS++/0.1%  
879 saponin followed by two washes in PBS, and mean cellular fluorescence was detected using a  
880 high-throughput Intellicyte iQue flow cytometer (Sartorius). Antibody reactivity against each  
881 mutant S protein clone was calculated relative to wild-type S protein reactivity by subtracting the  
882 signal from mock-transfected controls and normalizing to the signal from wild-type S-transfected  
883 controls. Mutations within clones were identified as critical to the mAb epitope if they did not  
884 support reactivity of the test MAb but supported reactivity of other SARS-CoV-2 antibodies.  
885 This counter-screen strategy facilitates the exclusion of S protein mutants that are locally  
886 misfolded or have an expression defect.

887

888 **Measurement of viral burden.** Plaque assays were performed as described previously (Case et  
889 al., 2020; Hassan et al., 2020) on Vero+TMPRSS2+hACE2 cells. Briefly, lung homogenates  
890 were serially diluted and added to Vero+TMPRSS2+hACE2 cell monolayers in 12-well plates.  
891 Plates were incubated at 37°C for 1 h and then overlaid with 1% (w/v) methylcellulose in  
892 MEM supplemented with 2% FBS. Plates were incubated at 37°C for 72 h and were then fixed  
893 with 4% PFA for 20 min. Plaques were visualized by staining with 0.05% crystal violet in 20%  
894 methanol.

895

896 **Quantification and statistical analysis.** Mean  $\pm$  S.E.M. or mean  $\pm$  S.D. were determined for  
897 continuous variables as noted. Technical and biological replicates are described in the figure  
898 legends. For analysis of mouse studies, the comparison of weight-change curves was performed  
899 using a one-way ANOVA with Dunnett's post hoc test of the area under the curve for days 3-6  
900 post-infection, using Prism v.9.0 (GraphPad). Infectious viral loads were compared by a one-way  
901 ANOVA with Dunnett's multiple comparisons test using Prism v.9.0 (GraphPad).

902 **Figure S1. Divergence from inferred germline gene sequences, related to Figure 2**

903 A. The number of mutations of each mAb relative to the inferred germline variable gene was  
904 counted for each clone. These numbers then were transformed into percent values and plotted as  
905 violin plots. For the heavy chain, values range from 80.4 to 100, with a median of 96.6, a 25th  
906 quartile of 94.6 and a 75th quartile of 97.6. For the light chain, values range from 88.1 to 100,  
907 with a median of 97.9, a 25th quartile of 96.5 and a 75th quartile of 98.9.

908 B. Bar graph showing IGHV gene usage by 102 clones expressed Y-axis represents number of  
909 times same IGHV appeared and on x-axis is the IGHV gene identified.

910 **Figure S2. Gating strategy for cell-surface antigen-display experiment, related to Figure 3**

911 A. The first gate is for all cells, the second gate is for infected cells, and the third gate is for  
912 antibody binding to infected cells.

913 B. Overlay of histograms infected cells in light grey on uninfected cells in dark grey gated for  
914 Alexa Fluor 647 staining.

915 **Figure S3. Phylogenetic tree obtained after aligning multiple sequence of the heavy chain of**  
916 **IGHV1-24 genes, related to Figure 3** identified in this study (red) with IGHV 1-24 genes



917 available from sequences 1) deposited in public databases shown in cyan color, 2) from  
918 vaccinated individuals shown in purple, or 3) from infected individuals shown in orange.

919 **Figure S4. Competition ELISA of mAbs, related to Figure 4**

920 Competition ELISA of mAbs with previously mapped antibodies COV2-2130, COV2-2196,  
921 COV2-2676, COV2-2489, r4A8 or rCR3022. Unlabeled antibodies applied to antigen first are  
922 indicated on the left, while biotinylated antibodies that were added to antigen-coated wells  
923 second are listed across the top. The number in each box represents the percent competition  
924 binding of the biotinylated antibody in the presence of the indicated competing antibody. Heat  
925 map colors range from dark grey (100% blocking of the biotinylated antibody) to white (0% or  
926 no blocking of the biotinylated antibody).

927 **Figure S5. Epitope identification and characterization of COV2-3439, related to Figure 4**

928 Residues critical for COV2-3439 binding, identified by screening COV2-3439 on an NTD  
929 alanine-scan mutagenesis library, are shown in red spheres on the NTD (PDB 7L2C).

930 **Figure S6. Structural characterization of COV2-3434, related to Figure 5**

931 Steric clash of COV2-3434 Fab (green) with SARS-CoV2- S monomer (cyan) in open  
932 conformation when modeled double Fab (COV2-3434 Fab (green) COV2-3439 Fab (magenta) +  
933 rNTD (blue) complex on to SARS-CoV2- S monomer (cyan) in open conformation.

934 **Figure S7. Neutralization of VSV-S by COV2-3434 related to Figure 5**

935 A. Neutralization of VSV-S by COV2-3434 was measured in the absence or presence of 0.02%  
936 polysorbate-80 in Vero-CCL81 cells.

937 B. Neutralization of VSV-S by COV2-3434 was measured in the absence or presence of 25  $\mu$ M  
938 biliverdin in Vero-CCL81 cells.

939 **Figure S8. Protection in K18 hACE2 transgenic mice by trimer-disrupting antibody COV2-**  
940 **3434, related to Figure 6.**

941 Eight-week-old female K18-hACE2 transgenic mice were inoculated by the intranasal route with  
942 104 FFU of SARS-CoV-2 (WA1/2020 D614G). One day prior to virus inoculation, mice were  
943 given a single 1 mg dose of COV2-3434, COV2-2196, or isotype control mAb by intraperitoneal  
944 injection. Data are from two independent experiments, n=7 (isotype) or 8 (all other groups).

945 A. Weight was monitored daily. Two-way ANOVA with Dunnett's post-test with comparison to  
946 control mAb: \*\*, p<0.001; \*, p<0.05; ns, not significant.

947 B. At 6 dpi, tissues were collected, and viral RNA levels in indicated tissues were determined  
948 (line indicates median). One-way ANOVA with Dunnett's post-test: \*\*\*\*, p<0.0001; \*p<0.05;  
949 ns, not significant. The dotted line represents the limit of detection (LOD) of the assay.

950

951

952

953

954

955

956

957

958

959

960

961

962 **REFERENCES**

963 Alamyar, E., Duroux, P., Lefranc, M.P., and Giudicelli, V. (2012). IMGT((R)) tools for the  
964 nucleotide analysis of immunoglobulin (IG) and T cell receptor (TR) V-(D)-J repertoires,  
965 polymorphisms, and IG mutations: IMGT/V-QUEST and IMGT/HighV-QUEST for NGS.  
966 *Methods Mol Biol* 882, 569-604.

967

968 Amraei, R., Yin, W.Q., Napoleon, M.A., Suder, E.L., Berrigan, J., Zhao, Q., Olejnik, J.,  
969 Chandler, K.B., Xia, C.S., Feldman, J., et al. (2021). CD209L/L-SIGN and CD209/DC-SIGN  
970 Act as Receptors for SARS-CoV-2. *Acs Central Sci* 7, 1156-1165.

971

972 Avanzato, V.A., Matson, M.J., Seifert, S.N., Pryce, R., Williamson, B.N., Anzick, S.L., Barbian,  
973 K., Judson, S.D., Fischer, E.R., Martens, C., et al. (2020). Case Study: Prolonged Infectious  
974 SARS-CoV-2 Shedding from an Asymptomatic Immunocompromised Individual with Cancer.  
975 *Cell* 183, 1901-1912 e1909.

976

977 Awasthi, M., Gulati, S., Sarkar, D.P., Tiwari, S., Kateriya, S., Ranjan, P., and Verma, S.K.  
978 (2020). The Sialoside-Binding Pocket of SARS-CoV-2 Spike Glycoprotein Structurally  
979 Resembles MERS-CoV. *Viruses* 12.

980

981 Baden, L.R., El Sahly, H.M., Essink, B., Kotloff, K., Frey, S., Novak, R., Diemert, D., Spector,  
982 S.A., Roupael, N., Creech, C.B., et al. (2021). Efficacy and Safety of the mRNA-1273 SARS-  
983 CoV-2 Vaccine. *N Engl J Med* 384, 403-416.

984

985 Bangaru, S., Lang, S., Schotsaert, M., Vanderven, H.A., Zhu, X., Kose, N., Bombardi, R., Finn,  
986 J.A., Kent, S.J., Gilchuk, P., et al. (2019). A Site of Vulnerability on the Influenza Virus  
987 Hemagglutinin Head Domain Trimer Interface. *Cell* 177, 1136-1152 e1118.

988

989 Barnes, C.O., Jette, C.A., Abernathy, M.E., Dam, K.A., Esswein, S.R., Gristick, H.B., Malyutin,  
990 A.G., Sharaf, N.G., Huey-Tubman, K.E., Lee, Y.E., et al. (2020). SARS-CoV-2 neutralizing  
991 antibody structures inform therapeutic strategies. *Nature* 588, 682-687.

992

993 Baum, A., Fulton, B.O., Wloga, E., Copin, R., Pascal, K.E., Russo, V., Giordano, S., Lanza, K.,  
994 Negron, N., Ni, M., et al. (2020). Antibody cocktail to SARS-CoV-2 spike protein prevents rapid  
995 mutational escape seen with individual antibodies. *Science* 369, 1014-1018.

996

997 Cantuti-Castelvetri, L., Ojha, R., Pedro, L.D., Djannatian, M., Franz, J., Kuivanen, S., van der  
998 Meer, F., Kallio, K., Kaya, T., Anastasina, M., et al. (2020). Neuropilin-1 facilitates SARS-CoV-  
999 2 cell entry and infectivity. *Science* 370, 856-860.

1000

1001 Case, J.B., Rothlauf, P.W., Chen, R.E., Liu, Z., Zhao, H., Kim, A.S., Bloyet, L.M., Zeng, Q.,  
1002 Tahan, S., Droit, L., et al. (2020). Neutralizing Antibody and Soluble ACE2 Inhibition of a  
1003 Replication-Competent VSV-SARS-CoV-2 and a Clinical Isolate of SARS-CoV-2. *Cell Host*  
1004 *Microbe* 28, 475-485 e475.

1005

1006 Cerutti, G., Guo, Y., Wang, P., Nair, M.S., Wang, M., Huang, Y., Yu, J., Liu, L., Katsamba, P.S.,  
1007 Bahna, F., et al. (2021a). Neutralizing antibody 5-7 defines a distinct site of vulnerability in  
1008 SARS-CoV-2 spike N-terminal domain. *Cell Rep* 37, 109928.

1009

1010 Cerutti, G., Guo, Y., Zhou, T., Gorman, J., Lee, M., Rapp, M., Reddem, E.R., Yu, J., Bahna, F.,  
1011 Bimela, J., et al. (2021b). Potent SARS-CoV-2 neutralizing antibodies directed against spike N-  
1012 terminal domain target a single supersite. *Cell Host & Microbe* 29, 819-833.e817.

1013

1014 Chen, E.C., Gilchuk, P., Zost, S.J., Suryadevara, N., Winkler, E.S., Cabel, C.R., Binshtein, E.,  
1015 Chen, R.E., Sutton, R.E., Rodriguez, J., et al. (2021a). Convergent antibody responses to the  
1016 SARS-CoV-2 spike protein in convalescent and vaccinated individuals. *Cell Rep* 36, 109604.

1017

1018 Chen, R.E., Winkler, E.S., Case, J.B., Aziati, I.D., Bricker, T.L., Joshi, A., Darling, T.L., Ying,  
1019 B., Errico, J.M., Shrihari, S., et al. (2021b). In vivo monoclonal antibody efficacy against SARS-  
1020 CoV-2 variant strains. *Nature* 596, 103-108.

1021

1022 Chi, X., Yan, R., Zhang, J., Zhang, G., Zhang, Y., Hao, M., Zhang, Z., Fan, P., Dong, Y., Yang,  
1023 Y., et al. (2020). A neutralizing human antibody binds to the N-terminal domain of the Spike  
1024 protein of SARS-CoV-2. *Science* 369, 650-655.

1025  
1026 Chng, J., Wang, T., Nian, R., Lau, A., Hoi, K.M., Ho, S.C., Gagnon, P., Bi, X., and Yang, Y.  
1027 (2015). Cleavage efficient 2A peptides for high level monoclonal antibody expression in CHO  
1028 cells. *MAbs* 7, 403-412.

1029  
1030 Choi, B., Choudhary, M.C., Regan, J., Sparks, J.A., Padera, R.F., Qiu, X., Solomon, I.H., Kuo,  
1031 H.H., Boucau, J., Bowman, K., et al. (2020). Persistence and Evolution of SARS-CoV-2 in an  
1032 Immunocompromised Host. *N Engl J Med* 383, 2291-2293.

1033  
1034 Daly, J.L., Simonetti, B., Klein, K., Chen, K.E., Williamson, M.K., Anton-Plagaro, C.,  
1035 Shoemark, D.K., Simon-Gracia, L., Bauer, M., Hollandi, R., et al. (2020). Neuropilin-1 is a host  
1036 factor for SARS-CoV-2 infection. *Science* 370, 861.

1037  
1038 Davidson, E., and Doranz, B.J. (2014). A high-throughput shotgun mutagenesis approach to  
1039 mapping B-cell antibody epitopes. *Immunology* 143, 13-20.

1040  
1041 Dong, J., Zost, S.J., Greaney, A.J., Starr, T.N., Dingens, A.S., Chen, E.C., Chen, R.E., Case, J.B.,  
1042 Sutton, R.E., Gilchuk, P., et al. (2021). Genetic and structural basis for SARS-CoV-2 variant  
1043 neutralization by a two-antibody cocktail. *Nat Microbiol* 6, 1233-1244.

1044

1045 Gilchuk, P., Bombardi, R.G., Erasmus, J.H., Tan, Q., Nargi, R., Soto, C., Abbink, P., Suscovich,  
1046 T.J., Durnell, L.A., Khandhar, A., et al. (2020). Integrated pipeline for the accelerated discovery  
1047 of antiviral antibody therapeutics. *Nat Biomed Eng* 4, 1030-1043.

1048  
1049 Golden, J.W., Cline, C.R., Zeng, X., Garrison, A.R., Carey, B.D., Mucker, E.M., White, L.E.,  
1050 Shamblin, J.D., Brocato, R.L., Liu, J., et al. (2020). Human angiotensin-converting enzyme 2  
1051 transgenic mice infected with SARS-CoV-2 develop severe and fatal respiratory disease. *JCI*  
1052 *Insight* 5.

1053  
1054 Greaney, A.J., Starr, T.N., Gilchuk, P., Zost, S.J., Binshtein, E., Loes, A.N., Hilton, S.K.,  
1055 Huddleston, J., Eguia, R., Crawford, K.H.D., et al. (2021). Complete Mapping of Mutations to  
1056 the SARS-CoV-2 Spike Receptor-Binding Domain that Escape Antibody Recognition. *Cell Host*  
1057 *Microbe* 29, 44-57 e49.

1058  
1059 Gupta, N.T., Vander Heiden, J.A., Uduman, M., Gadala-Maria, D., Yaari, G., and Kleinstein,  
1060 S.H. (2015). Change-O: a toolkit for analyzing large-scale B cell immunoglobulin repertoire  
1061 sequencing data. *Bioinformatics* 31, 3356-3358.

1062  
1063 Hansen, J., Baum, A., Pascal, K.E., Russo, V., Giordano, S., Wloga, E., Fulton, B.O., Yan, Y.,  
1064 Koon, K., Patel, K., et al. (2020). Studies in humanized mice and convalescent humans yield a  
1065 SARS-CoV-2 antibody cocktail. *Science* 369, 1010-1014.

1066

1067 Hassan, A.O., Case, J.B., Winkler, E.S., Thackray, L.B., Kafai, N.M., Bailey, A.L., McCune,  
1068 B.T., Fox, J.M., Chen, R.E., Alsoussi, W.B., et al. (2020). A SARS-CoV-2 Infection Model in  
1069 Mice Demonstrates Protection by Neutralizing Antibodies. *Cell* 182, 744-753 e744.

1070

1071 Henderson, R., Edwards, R.J., Mansouri, K., Janowska, K., Stalls, V., Gobeil, S.M.C., Kopp, M.,  
1072 Li, D., Parks, R., Hsu, A.L., et al. (2020). Controlling the SARS-CoV-2 spike glycoprotein  
1073 conformation. *Nat Struct Mol Biol* 27, 925-933.

1074

1075 Hsieh, C.L., Goldsmith, J.A., Schaub, J.M., DiVenere, A.M., Kuo, H.C., Javanmardi, K., Le,  
1076 K.C., Wrapp, D., Lee, A.G., Liu, Y., et al. (2020). Structure-based design of prefusion-stabilized  
1077 SARS-CoV-2 spikes. *Science* 369, 1501-1505.

1078

1079 Huang, J.C., Diaz, D., and Mousa, J.J. (2020). Antibody recognition of the Pneumovirus fusion  
1080 protein trimer interface. *Plos Pathogens* 16.

1081

1082 Lempp, F.A., Soriaga, L.B., Montiel-Ruiz, M., Benigni, F., Noack, J., Park, Y.J., Bianchi, S.,  
1083 Walls, A.C., Bowen, J.E., Zhou, J., et al. (2021). Lectins enhance SARS-CoV-2 infection and  
1084 influence neutralizing antibodies. *Nature* 598, 342-347.

1085

1086 Mastronarde, D.N. (2005). Automated electron microscope tomography using robust prediction  
1087 of specimen movements. *Journal of Structural Biology* 152, 36-51.

1088



1089 McCallum, M., De Marco, A., Lempp, F.A., Tortorici, M.A., Pinto, D., Walls, A.C., Beltramello,  
1090 M., Chen, A., Liu, Z., Zatta, F., et al. (2021). N-terminal domain antigenic mapping reveals a site  
1091 of vulnerability for SARS-CoV-2. *Cell* 184, 2332-2347 e2316.

1092  
1093 McCarthy, K.R., Rennick, L.J., Nambulli, S., Robinson-McCarthy, L.R., Bain, W.G., Haidar, G.,  
1094 and Duprex, W.P. (2021). Recurrent deletions in the SARS-CoV-2 spike glycoprotein drive  
1095 antibody escape. *Science* 371, 1139-1142.

1096  
1097 Ohi, M., Li, Y., Cheng, Y., and Walz, T. (2004). Negative Staining and Image Classification -  
1098 Powerful Tools in Modern Electron Microscopy. *Biol Proced Online* 6, 23-34.

1099  
1100 Oladunni, F.S., Park, J.G., Pino, P.A., Gonzalez, O., Akhter, A., Allue-Guardia, A., Olmo-  
1101 Fontanez, A., Gautam, S., Garcia-Vilanova, A., Ye, C., et al. (2020). Lethality of SARS-CoV-2  
1102 infection in K18 human angiotensin-converting enzyme 2 transgenic mice. *Nat Commun* 11,  
1103 6122.

1104 Pinto, D., Park, Y.J., Beltramello, M., Walls, A.C., Tortorici, M.A., Bianchi, S., Jaconi, S.,  
1105 Culap, K., Zatta, F., De Marco, A., et al. (2020). Cross-neutralization of SARS-CoV-2 by a  
1106 human monoclonal SARS-CoV antibody. *Nature* 583, 290-295.

1107  
1108 Polack, F.P., Thomas, S.J., Kitchin, N., Absalon, J., Gurtman, A., Lockhart, S., Perez, J.L., Perez  
1109 Marc, G., Moreira, E.D., Zerbini, C., et al. (2020). Safety and Efficacy of the BNT162b2 mRNA  
1110 Covid-19 Vaccine. *N Engl J Med* 383, 2603-2615.

1111

1112 Punjani, A., Rubinstein, J.L., Fleet, D.J., and Brubaker, M.A. (2017). cryoSPARC: algorithms  
1113 for rapid unsupervised cryo-EM structure determination. *Nature Methods* 14, 290.  
1114  
1115 Robbiani, D.F., Gaebler, C., Muecksch, F., Lorenzi, J.C.C., Wang, Z., Cho, A., Agudelo, M.,  
1116 Barnes, C.O., Gazumyan, A., Finkin, S., et al. (2020). Convergent antibody responses to SARS-  
1117 CoV-2 in convalescent individuals. *Nature* 584, 437-442.  
1118  
1119 Rogers, T.F., Zhao, F., Huang, D., Beutler, N., Burns, A., He, W.T., Limbo, O., Smith, C., Song,  
1120 G., Woehl, J., et al. (2020). Isolation of potent SARS-CoV-2 neutralizing antibodies and  
1121 protection from disease in a small animal model. *Science* 369, 956-963.  
1122  
1123 Rosa, A., Pye, V.E., Graham, C., Muir, L., Seow, J., Ng, K.W., Cook, N.J., Rees-Spear, C.,  
1124 Parker, E., dos Santos, M.S., et al. (2021). SARS-CoV-2 can recruit a heme metabolite to evade  
1125 antibody immunity. *Science Advances* 7.  
1126  
1127 Setliff, I., Shiakolas, A.R., Pilewski, K.A., Murji, A.A., Mapengo, R.E., Janowska, K.,  
1128 Richardson, S., Oosthuysen, C., Raju, N., Ronsard, L., et al. (2019). High-Throughput Mapping  
1129 of B Cell Receptor Sequences to Antigen Specificity. *Cell* 179, 1636-1646 e1615.  
1130  
1131 Shi, R., Shan, C., Duan, X., Chen, Z., Liu, P., Song, J., Song, T., Bi, X., Han, C., Wu, L., et al.  
1132 (2020). A human neutralizing antibody targets the receptor-binding site of SARS-CoV-2. *Nature*  
1133 584, 120-124.  
1134

1135 Shiakolas, A.R., Kramer, K.J., Wrapp, D., Richardson, S.I., Schafer, A., Wall, S., Wang, N.,  
1136 Janowska, K., Pilewski, K.A., Venkat, R., et al. (2021). Cross-reactive coronavirus antibodies  
1137 with diverse epitope specificities and Fc effector functions. *Cell Rep Med* 2, 100313.  
1138  
1139 Soto, C., Bombardi, R.G., Branchizio, A., Kose, N., Matta, P., Sevy, A.M., Sinkovits, R.S.,  
1140 Gilchuk, P., Finn, J.A., and Crowe, J.E., Jr. (2019). High frequency of shared clonotypes in  
1141 human B cell receptor repertoires. *Nature* 566, 398-402.  
1142  
1143 Suryadevara, N., Shrihari, S., Gilchuk, P., VanBlargan, L.A., Binshtein, E., Zost, S.J., Nargi,  
1144 R.S., Sutton, R.E., Winkler, E.S., and Chen, E.C. (2021). Neutralizing and protective human  
1145 monoclonal antibodies recognizing the N-terminal domain of the SARS-CoV-2 spike protein.  
1146 *Cell* 184, 2316-2331.  
1147  
1148 Turner, H.L., Andrabi, R., Cottrell, C.A., Richey, S.T., Song, G., Callaghan, S., Anzanello, F.,  
1149 Moyer, T.J., Abraham, W., Melo, M., et al. (2021a). Disassembly of HIV envelope glycoprotein  
1150 trimer immunogens is driven by antibodies elicited via immunization. *Science Advances* 7.  
1151  
1152 Turner, J.S., Kim, W., Kalaidina, E., Goss, C.W., Rauseo, A.M., Schmitz, A.J., Hansen, L.,  
1153 Haile, A., Klebert, M.K., Pusic, I., et al. (2021b). SARS-CoV-2 infection induces long-lived  
1154 bone marrow plasma cells in humans. *Nature* 595, 421-425.  
1155

1156 Turner, J.S., O'Halloran, J.A., Kalaidina, E., Kim, W., Schmitz, A.J., Zhou, J.Q., Lei, T., Thapa,  
1157 M., Chen, R.E., Case, J.B., et al. (2021c). SARS-CoV-2 mRNA vaccines induce persistent  
1158 human germinal centre responses. *Nature* 596, 109-113.

1159

1160 Voss, W.N., Hou, Y.J., Johnson, N.V., Delidakis, G., Kim, J.E., Javanmardi, K., Horton, A.P.,  
1161 Bartzoka, F., Paresi, C.J., Tanno, Y., et al. (2021). Prevalent, protective, and convergent IgG  
1162 recognition of SARS-CoV-2 non-RBD spike epitopes. *Science* 372, 1108-1112.

1163

1164 Weisblum, Y., Schmidt, F., Zhang, F., DaSilva, J., Poston, D., Lorenzi, J.C., Muecksch, F.,  
1165 Rutkowska, M., Hoffmann, H.H., Michailidis, E., et al. (2020). Escape from neutralizing  
1166 antibodies by SARS-CoV-2 spike protein variants. *Elife* 9.

1167

1168 Winkler, E.S., Gilchuk, P., Yu, J., Bailey, A.L., Chen, R.E., Chong, Z., Zost, S.J., Jang, H.,  
1169 Huang, Y., Allen, J.D., et al. (2021). Human neutralizing antibodies against SARS-CoV-2  
1170 require intact Fc effector functions for optimal therapeutic protection. *Cell* 184, 1804-1820  
1171 e1816.

1172

1173 Wrapp, D., Wang, N., Corbett, K.S., Goldsmith, J.A., Hsieh, C.L., Abiona, O., Graham, B.S.,  
1174 and McLellan, J.S. (2020). Cryo-EM structure of the 2019-nCoV spike in the prefusion  
1175 conformation. *Science* 367, 1260-1263.

1176

1177 Wu, N.C., Yuan, M., Liu, H., Lee, C.D., Zhu, X., Bangaru, S., Torres, J.L., Caniels, T.G.,  
1178 Brouwer, P.J.M., van Gils, M.J., et al. (2020). An Alternative Binding Mode of IGHV3-53  
1179 Antibodies to the SARS-CoV-2 Receptor Binding Domain. *Cell Rep* 33, 108274.  
1180  
1181 Yuan, M., Liu, H., Wu, N.C., Lee, C.D., Zhu, X., Zhao, F., Huang, D., Yu, W., Hua, Y., Tien,  
1182 H., et al. (2020). Structural basis of a shared antibody response to SARS-CoV-2. *Science* 369,  
1183 1119-1123.  
1184  
1185 Zost, S.J., Dong, J., Gilchuk, I.M., Gilchuk, P., Thornburg, N.J., Bangaru, S., Kose, N., Finn,  
1186 J.A., Bombardi, R., Soto, C., et al. (2021). Canonical features of human antibodies recognizing  
1187 the influenza hemagglutinin trimer interface. *J Clin Invest* 131.  
1188  
1189 Zost, S.J., Gilchuk, P., Case, J.B., Binshtein, E., Chen, R.E., Nkolola, J.P., Schafer, A., Reidy,  
1190 J.X., Trivette, A., Nargi, R.S., et al. (2020a). Potently neutralizing and protective human  
1191 antibodies against SARS-CoV-2. *Nature* 584, 443-449.  
1192  
1193 Zost, S.J., Gilchuk, P., Chen, R.E., Case, J.B., Reidy, J.X., Trivette, A., Nargi, R.S., Sutton, R.E.,  
1194 Suryadevara, N., Chen, E.C., et al. (2020b). Rapid isolation and profiling of a diverse panel of  
1195 human monoclonal antibodies targeting the SARS-CoV-2 spike protein. *Nat Med* 26, 1422-1427.  
1196

Figure 1

## Binding by antibodies in donor serum or plasma

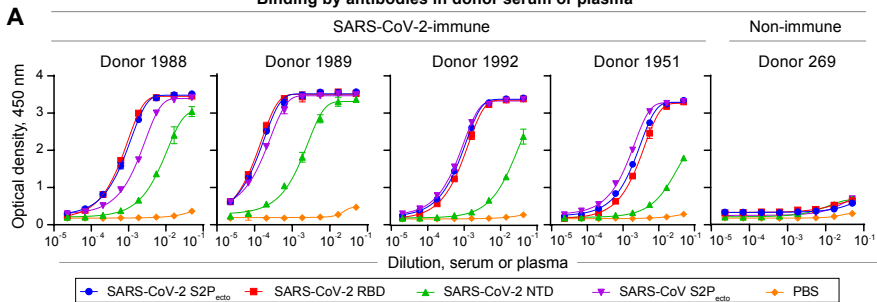

## Neutralization by antibodies in donor 1989 serum or plasma

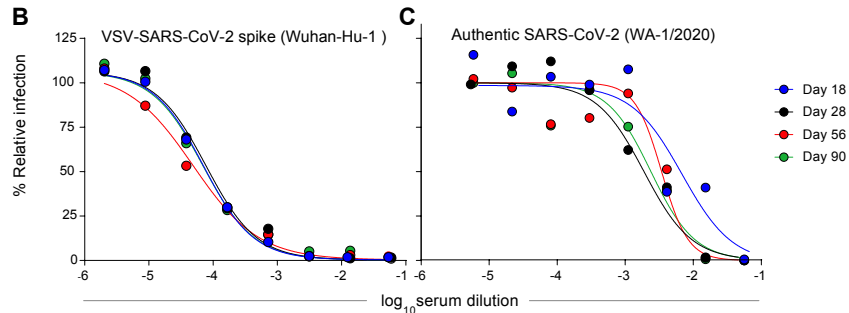

Figure 2

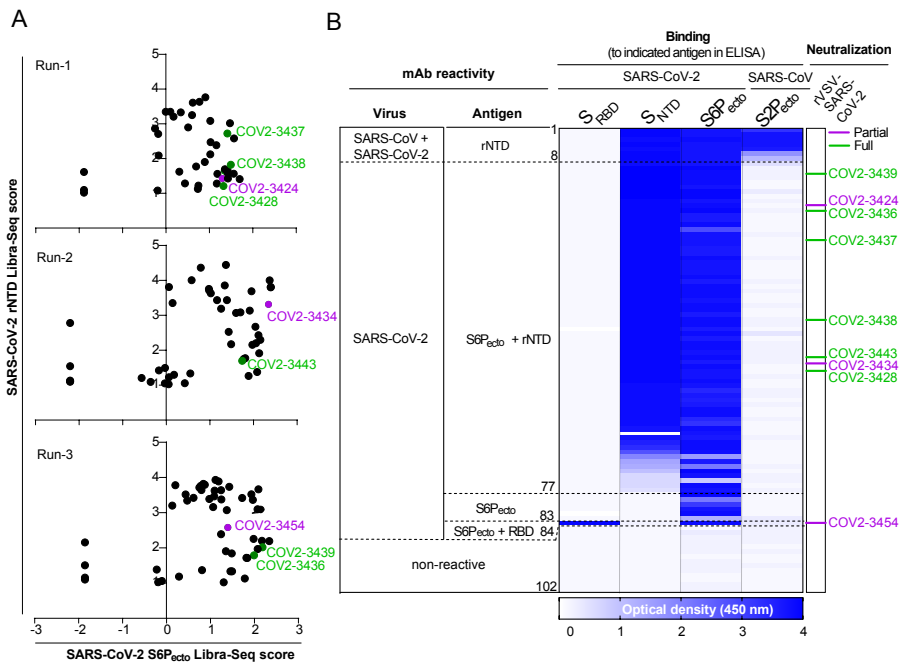

**C**

| mAb       | Heavy chain genes |      | Light chain genes |      | ELISA reactivity<br>(OD at 450 nm for indicated antigen) |                  |                     |                     | LIBRA-Seq score<br>(for indicated antigen) |                     |                     |
|-----------|-------------------|------|-------------------|------|----------------------------------------------------------|------------------|---------------------|---------------------|--------------------------------------------|---------------------|---------------------|
|           | IGHV              | IGHJ | IGLV              | IGLJ | SARS-CoV-2                                               |                  |                     | SARS-COV            | SARS-CoV-2                                 |                     | SARS-CoV            |
|           |                   |      |                   |      | S <sub>RBD</sub>                                         | S <sub>NTD</sub> | S6P <sub>ecto</sub> | S2P <sub>ecto</sub> | S <sub>NTD</sub>                           | S6P <sub>ecto</sub> | S2P <sub>ecto</sub> |
| COV2-3424 | 3-23*01           | 4*02 | 3-1*01            | 1*01 | 0.1                                                      | 3.9              | 2.8                 | 0.1                 | 2.7                                        | 1.2                 | -2.3                |
| COV2-3428 | 3-53*01           | 3*02 | 1-5*03            | 1*01 | 0.1                                                      | 3.8              | 3.6                 | 0.2                 | 1.4                                        | 1.3                 | 0.3                 |
| COV2-3434 | 1-2*02            | 3*02 | 1-44*01           | 3*02 | 0.1                                                      | 3.8              | 3.4                 | 0.2                 | 3.3                                        | 2.3                 | -0.8                |
| COV2-3436 | 1-24*01           | 4*02 | 1-40*01           | 2*01 | 0.1                                                      | 3.9              | 3.7                 | 0.1                 | 2.0                                        | 2.2                 | -0.3                |
| COV2-3437 | "                 | 5*02 | 3-20*01           | 1*01 | 0.1                                                      | 3.9              | 3.6                 | 0.2                 | 1.7                                        | 1.4                 | -0.1                |
| COV2-3438 | "                 | "    | 2-23*02           | 2*01 | 0.1                                                      | 3.8              | 3.8                 | 0.1                 | 1.8                                        | 1.5                 | -0.9                |
| COV2-3439 | "                 | "    | 1-39*01           | 1*01 | 0.1                                                      | 4.0              | 3.8                 | 0.1                 | 1.8                                        | 2.0                 | 0.6                 |
| COV2-3443 | "                 | 6*02 | 1-44*01           | 3*02 | 0.1                                                      | 3.9              | 3.8                 | 0.1                 | 1.7                                        | 1.7                 | -2.4                |

**Figure 3**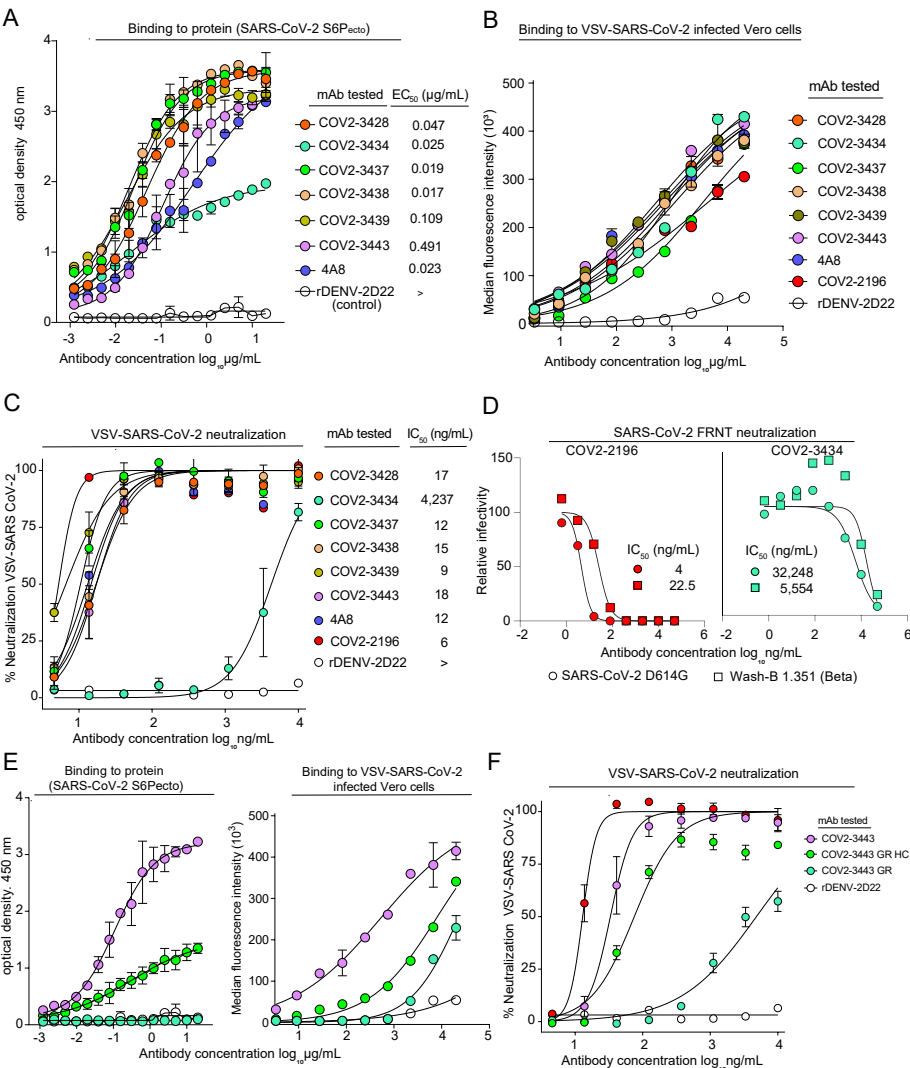



Figure 4

A

|                       |     | Second mAb (biotinylated) |    |    |    |    |    |     |    |    |    |    |    | % Competition |    |          |
|-----------------------|-----|---------------------------|----|----|----|----|----|-----|----|----|----|----|----|---------------|----|----------|
|                       |     | NTD                       |    |    |    |    |    | RBD |    |    |    |    |    |               |    |          |
| First mAb (unlabeled) | NTD | COV2-3428                 | 99 | 51 | 24 | 62 | 91 | 92  | 91 | 59 | 25 | 0  | 0  | 0             | 13 | 0<br>100 |
|                       |     | COV2-3437                 | 51 | 87 | 95 | 90 | 88 | 94  | 92 | 74 | 11 | 0  | 0  | 0             | 0  |          |
|                       |     | COV2-3438                 | 24 | 88 | 88 | 90 | 87 | 93  | 95 | 82 | 8  | 0  | 0  | 0             | 4  |          |
|                       |     | COV2-3439                 | 62 | 89 | 85 | 83 | 94 | 94  | 93 | 67 | 3  | 0  | 0  | 0             | 5  |          |
|                       |     | COV2-3443                 | 90 | 85 | 87 | 94 | 86 | 92  | 84 | 85 | 12 | 0  | 0  | 0             | 12 |          |
|                       |     | 4A8                       | 92 | 93 | 92 | 94 | 90 | 90  | 81 | 88 | 6  | 0  | 0  | 0             | 6  |          |
|                       | RBD | COV2-2489                 | 90 | 91 | 88 | 93 | 88 | 86  | 86 | 73 | 5  | 0  | 0  | 0             | 2  |          |
|                       |     | COV2-2676                 | 58 | 74 | 88 | 69 | 85 | 88  | 95 | 67 | 7  | 0  | 0  | 0             | 7  |          |
|                       |     | COV2-3434                 | 25 | 0  | 0  | 0  | 15 | 8   | 27 | 0  | 91 | 0  | 0  | 0             | 15 |          |
|                       |     | COV2-2198                 | 0  | 0  | 0  | 0  | 0  | 17  | 33 | 0  | 4  | 92 | 0  | 0             | 0  |          |
|                       |     | COV2-2130                 | 0  | 0  | 0  | 0  | 6  | 16  | 24 | 0  | 11 | 0  | 87 | 12            |    |          |
|                       |     | rCR3022                   | 12 | 0  | 0  | 0  | 0  | 10  | 14 | 13 | 0  | 1  | 0  | 0             | 87 |          |

B

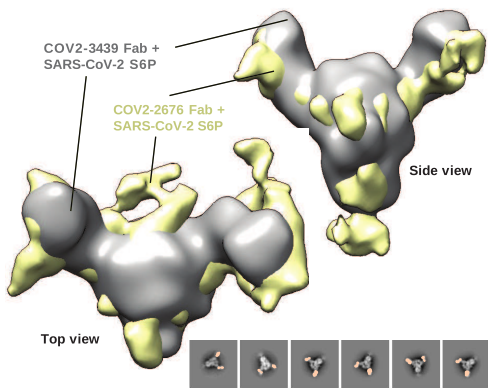

C

SARS-CoV-2 S6P only

COV2-3434 Fab + SARS-CoV-2 S6P

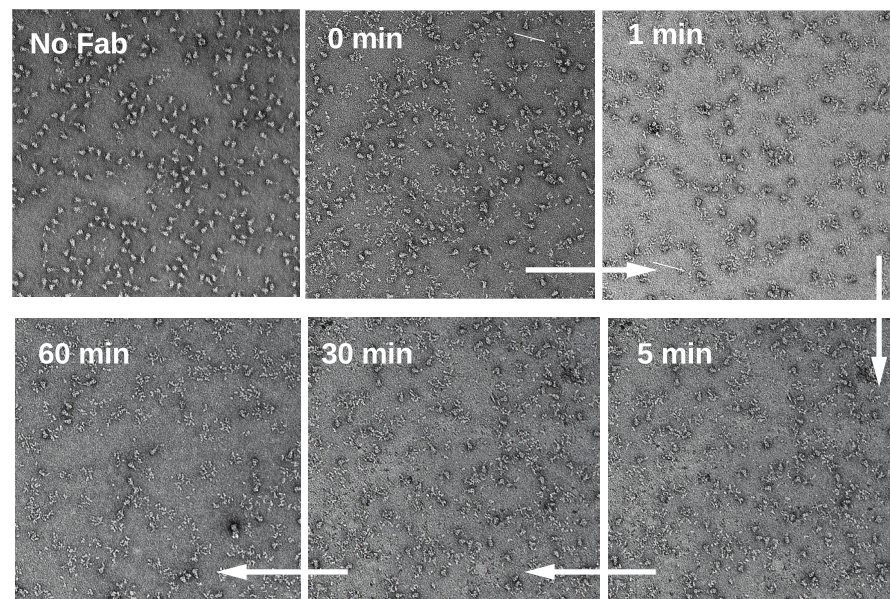

D

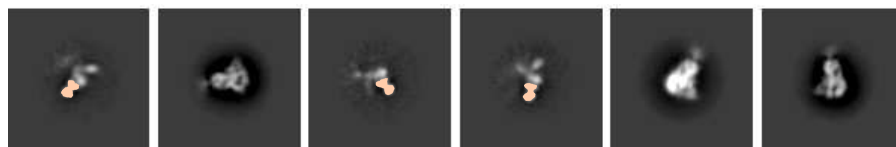

Figure 5

A

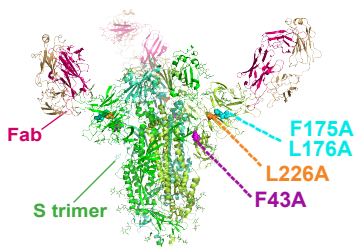

B

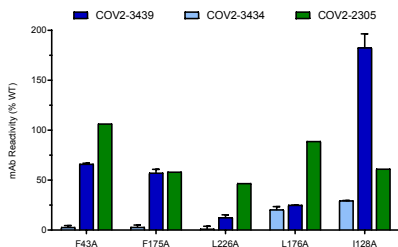

C

rNTD + Double Fab complex

Top view

Side view

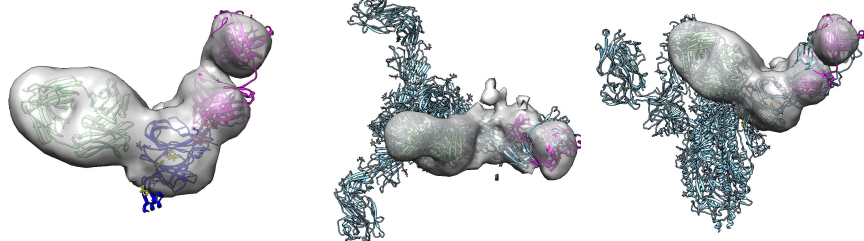

D

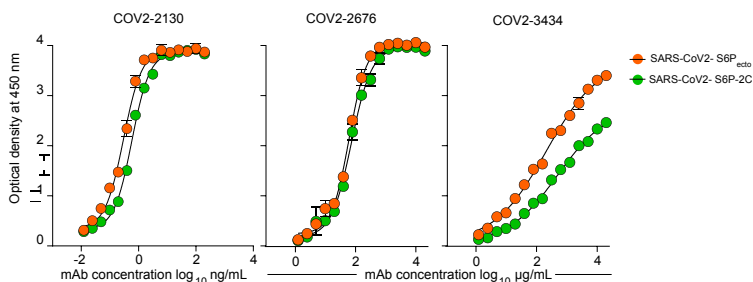

E

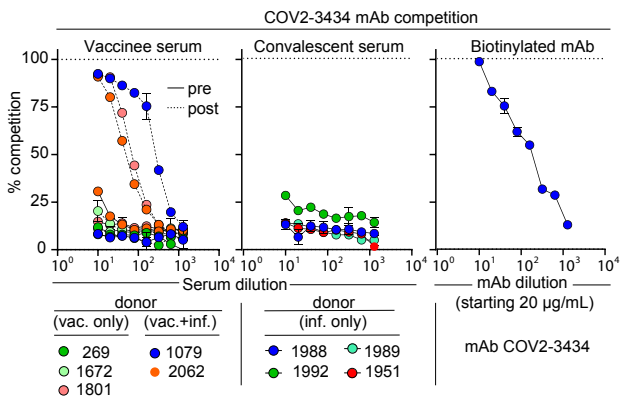

Figure 6

A

Escape virus selection using rVSV-SARS-CoV-2  $\Delta$ S21

| Antigen     | Antibody  | Confirmed escape at indicated concentration of mAb | Mutation selected | Reference                        | RTCA neutralization data  |                          |                   |
|-------------|-----------|----------------------------------------------------|-------------------|----------------------------------|---------------------------|--------------------------|-------------------|
|             |           |                                                    |                   |                                  | COV2-3434 (20 $\mu$ g/mL) | COV2-2196 (5 $\mu$ g/mL) | Escape virus only |
| Wild-type S | N/A       | N/A                                                | N/A               | Case <i>et al.</i> , 2020        |                           |                          |                   |
| RBD         | COV2-2130 | 5 $\mu$ g/mL                                       | K444R             | Dong <i>et al.</i> , 2021        |                           |                          |                   |
|             | COV2-2094 |                                                    | K378E             | Greaney <i>et al.</i> , 2020     |                           |                          |                   |
|             | COV2-2479 |                                                    | E484K             | "                                |                           |                          |                   |
|             | COV2-2499 |                                                    | G466D             | "                                |                           |                          |                   |
|             | COV2-2499 |                                                    | Q498R             | "                                |                           |                          |                   |
| NTD         | COV2-2489 | 100 $\mu$ g/mL                                     | R158S             | Suryadevara <i>et al.</i> , 2021 |                           |                          |                   |
|             | COV2-2489 |                                                    | G142D             | "                                |                           |                          |                   |
|             | COV2-2676 | 50 $\mu$ g/mL                                      | F140S             | "                                |                           |                          |                   |

\* Neutralization \* Cytopathic effect

B

## Weight change

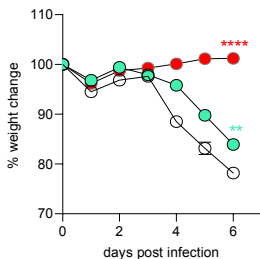

C

## Lung PFU

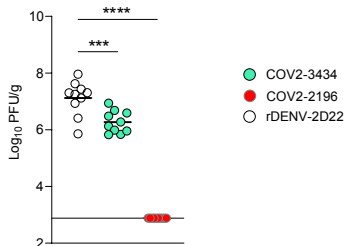

Source: https://www.biorxiv.org/content/10.1101/2022.01.12.476120v1.full.pdf
